# Supplementary material for: Machine learning for detecting age and sex effects on corpus callosum volume
Source: PeerJ journal article supplement (doi:10.7717/peerj-cs.3179), 2025-09-22
Supplement: Data1.xlsx [file Data1.xlsx]

## Sheet: Sheet1
	SFG_L	SFG_R	SFG_PFC_L	SFG_PFC_R	SFG_pole_L	SFG_pole_R	MFG_L	MFG_R	MFG_DPFC_L	MFG_DPFC_R	IFG_opercularis_L	IFG_opercularis_R	IFG_orbitalis_L	IFG_orbitalis_R	IFG_triangularis_L	IFG_triangularis_R	LFOG_L	LFOG_R	MFOG_L	MFOG_R	RG_L	RG_R	PoCG_L	PoCG_R	PrCG_L	PrCG_R	SPG_L	SPG_R	SMG_L	SMG_R	AG_L	AG_R	PrCu_L	PrCu_R	STG_L	STG_R	STG_L_pole	STG_R_pole	MTG_L	MTG_R	MTG_L_pole	MTG_R_pole	ITG_L	ITG_R	PHG_L	PHG_R	ENT_L	ENT_R	FuG_L
s1	9962	9074	10097	8550	3889	5035	8312	7142	16277	16317	5067	3970	4592	4144	6619	5415	4454	4799	4461	4791	7047	7172	10200	11352	19628	19446	5560	3390	8115	7772	5624	7300	6432	5054	12023	12762	4425	5374	12060	10688	1538	1709	15921	16307	1219	1521	606	1240	30923
s2	11775	8781	12473	9458	4045	5487	10334	8509	21167	20652	5205	3869	5625	4390	5414	5048	5753	4688	6462	5297	8727	9051	11785	12953	19114	20129	5295	3049	8451	9284	3411	8393	9383	6224	11070	9968	6231	6529	11451	12349	1819	1999	10825	13356	1124	809	1163	1056	21310
s3	12053	10949	10519	9696	2310	3929	8549	7439	11410	13722	3362	2873	3833	3270	3689	2734	4842	5340	5237	5042	6096	6289	11740	11894	13748	15809	6681	5826	9374	9124	7307	11534	7960	7594	13804	13337	5946	6582	17033	15439	3308	3149	15499	14843	1229	1364	994	1371	15494
s4	12053	10949	10519	9696	2310	3929	8549	7439	11410	13722	3362	2873	3833	3270	3689	2734	4842	5340	5237	5042	6096	6289	11740	11894	13748	15809	6681	5826	9374	9124	7307	11534	7960	7594	13804	13337	5946	6582	17033	15439	3308	3149	15499	14843	1229	1364	994	1371	15494
s5	10514	8145	10587	9559	2310	4144	7943	8697	12240	13755	4904	3297	3960	2646	3387	3434	4639	4330	4851	4512	6539	5841	12180	10461	11530	15544	8451	5970	9364	8492	7645	11847	7266	6614	12812	10755	5811	6083	17245	14279	3344	2927	12647	12996	1035	1180	660	919	14215
s6	12495	10195	9578	7920	2924	3124	9563	9233	13317	12312	3812	3321	3488	3235	3254	3032	4448	4035	4872	4510	5044	4928	11712	9771	12719	15546	7808	5532	8985	8534	6825	12606	6240	6743	14429	12240	6447	6415	16075	15550	2809	3049	13154	13210	1101	1287	893	1403	16967
s7	10960	9387	11280	9983	2757	4137	10024	9370	14305	15392	3977	3400	4242	3319	3450	3274	4690	5095	4577	4371	5687	6032	12314	12225	12936	16937	9962	7429	9105	9602	8952	12589	7634	7523	12668	11170	5719	6912	16114	15677	2905	2742	14020	14738	1154	1260	884	1187	15968
s8	9561	7142	7855	7013	2654	3488	7274	6143	11760	11732	3574	2520	2738	2282	3777	2959	4497	4712	3912	4090	4174	4568	9454	9587	11620	13881	7407	6462	7043	7560	6310	11269	6833	6537	13017	10622	5361	5354	14905	12584	2434	2226	11494	11997	1017	1058	805	1084	14939
s9	11839	8948	10416	10894	2262	4129	9923	9565	14766	15473	4099	3655	3964	2588	3747	2781	5196	5132	4757	4240	5663	5667	11207	12218	12938	16748	8010	6381	10523	10152	8119	11937	6032	5727	14046	12827	5541	4984	16575	15375	2502	2202	13365	13746	1172	1079	675	1002	15130
s10	7167	5937	7191	6347	1864	2550	5089	4950	8256	8970	2339	1765	3192	2447	2348	2149	3297	2914	3396	3330	3471	3923	7650	7349	8202	10675	4654	3739	5594	6390	5787	7656	4885	4722	8177	7326	3981	3767	11434	10360	1611	1590	11552	10394	777	769	542	640	11140
s11	10373	8149	8560	8800	2123	3317	7787	7506	10965	11579	3454	2920	3465	2552	2742	2498	4662	4277	4394	3831	5301	5072	10962	9824	11076	15150	7620	4694	7836	8076	7442	12102	6100	5063	13142	11119	4551	5129	13988	13345	1889	2069	10313	12225	1054	1240	584	1026	14507
s12	11635	9764	11305	9051	2670	3653	7973	7731	12291	13645	4047	3160	3968	3475	3070	2849	4585	4092	4872	4589	5858	6492	10197	10122	13377	14886	8318	6779	8850	8382	8631	12540	7679	6509	12304	12158	5526	5307	17442	15265	3023	2532	12269	11775	1092	1118	816	1176	15615
s13	10373	8149	8560	8800	2123	3317	7787	7506	10965	11579	3454	2920	3465	2552	2742	2498	4662	4277	4394	3831	5301	5072	10962	9824	11076	15150	7620	4694	7836	8076	7442	12102	6100	5063	13142	11119	4551	5129	13988	13345	1889	2069	10313	12225	1054	1240	584	1026	14507
s14	10373	8149	8560	8800	2123	3317	7787	7506	10965	11579	3454	2920	3465	2552	2742	2498	4662	4277	4394	3831	5301	5072	10962	9824	11076	15150	7620	4694	7836	8076	7442	12102	6100	5063	13142	11119	4551	5129	13988	13345	1889	2069	10313	12225	1054	1240	584	1026	14507
s15	10635	8618	10495	8562	2517	3726	9014	8605	14207	13617	3402	3338	3465	3246	3473	3274	4990	4422	4579	4215	5397	5342	11624	11271	12070	13909	8642	6677	10444	8564	9027	11297	7204	7532	13197	12522	5483	5279	16729	15385	2710	2948	13605	13596	1247	1320	904	1124	14946
s16	10611	8350	8706	8475	2196	3664	8230	8573	11875	13069	3719	2837	3805	2811	2751	2905	4347	4345	4679	4508	5607	5504	10056	10193	12837	15690	7077	6115	8772	8174	6649	12287	6717	6968	11774	10823	4793	4718	13971	13547	1780	2048	11205	11869	975	1114	651	1052	13472
s17	10949	9405	11284	9370	2777	4356	8524	8147	13251	12854	3689	3261	3413	3150	3029	2978	3996	4202	4742	4315	6164	5549	9876	9186	11414	14837	8123	6370	7819	7212	6434	10840	7142	5940	13847	13092	6064	6700	19212	16759	2695	2895	12085	12865	974	1270	760	1114	15158
s18	9582	7945	9462	8097	2267	3218	9240	9032	12552	13607	3456	3392	5102	3449	3079	2625	5273	5329	4870	4617	5535	5305	12567	12593	13277	15899	9218	6370	9617	10065	8579	13900	7011	7169	12825	12102	6569	6027	16902	16414	2562	2622	13071	13504	1305	1082	831	1054	17127
s19	9655	7015	8832	7484	1710	3689	6329	7043	10650	10806	3139	2477	3591	2635	2800	2194	4352	4219	4431	4442	4695	5269	11112	9505	11807	14625	7622	6447	9495	8940	7110	11320	6992	6822	12895	12739	4864	5567	14783	14209	2365	2327	10647	13431	1114	1517	745	1041	14387
s20	10319	9079	9512	8657	2483	3374	8912	7860	10058	12666	3188	2573	4015	3143	3141	2399	4650	4114	4459	4110	5402	5357	10652	10911	12722	12507	8515	5809	8590	7943	6203	11451	7585	6439	12004	11931	5310	5738	16600	13144	2494	2605	11849	12107	1105	1251	867	1266	13994
s21	11414	8204	9709	9336	2057	3420	8425	7928	12306	13037	3741	3344	3606	2507	3135	2644	3741	3612	4155	4330	5599	5127	10892	10157	10982	14080	8895	5794	9732	7857	6370	12420	6672	6552	11048	11509	5974	5899	16495	15437	2667	2687	11940	12801	1060	1262	713	949	14222
s22	9970	7763	11076	9792	2888	4247	7979	8607	12357	12964	3147	2865	4105	3027	2877	2674	4298	4281	4461	4409	6404	6231	11864	12777	11462	13459	7855	6540	9415	8460	7712	12081	6396	5601	12554	11539	5899	6443	16073	15066	2875	3192	12589	13519	1159	1515	908	1247	15792
s23	13114	11228	13202	11280	1435	2865	10257	10566	20789	23856	7337	6102	9546	5991	8119	6507	3514	2459	4185	2470	7032	6190	18576	17067	23880	30473	14288	11714	11822	11642	8742	20753	15912	11807	12083	12904	5474	2723	20682	21396	996	979	15505	18272	1517	2719	803	1819	23444
s24	12981	10227	12705	14342	6130	8959	15237	16994	26927	29119	5931	6308	7480	4536	5410	5790	9974	8044	10131	6465	9722	9724	9510	9490	12576	19904	5224	3195	7039	7409	3552	8130	8438	4894	11307	8957	6702	7553	15548	15255	2708	3344	10107	12004	1860	1624	899	1523	15799
s25	10461	8361	9285	8230	1909	3379	7024	7225	11822	11224	2779	2871	3964	2804	3162	2663	4024	3827	4349	4570	4620	4962	7763	8042	11528	12942	7575	4889	7568	6522	6188	9861	7285	6212	13469	11352	5732	4817	13746	11867	2395	1930	11425	11864	1290	1409	927	1264	13709
s26	13155	9325	11262	10369	2931	4302	9732	9870	15994	15771	3685	3559	4795	3471	3606	3220	4885	4146	4964	4328	6263	6064	13225	12338	14213	16281	10169	7697	10583	10283	10270	13232	8226	7568	13279	12818	7223	6327	19688	17922	3167	3115	14367	15062	1195	1129	773	1080	16928
s27	13155	9325	11262	10369	2931	4302	9732	9870	15994	15771	3685	3559	4795	3471	3606	3220	4885	4146	4964	4328	6263	6064	13225	12338	14213	16281	10169	7697	10583	10283	10270	13232	8226	7568	13279	12818	7223	6327	19688	17922	3167	3115	14367	15062	1195	1129	773	1080	16928
s28	13155	9325	11262	10369	2931	4302	9732	9870	15994	15771	3685	3559	4795	3471	3606	3220	4885	4146	4964	4328	6263	6064	13225	12338	14213	16281	10169	7697	10583	10283	10270	13232	8226	7568	13279	12818	7223	6327	19688	17922	3167	3115	14367	15062	1195	1129	773	1080	16928
s29	10935	8624	10962	10740	2961	4039	7834	8582	12310	12132	3197	2759	3910	3404	2912	2190	5192	5149	4990	5175	6434	6010	11095	11603	12522	14654	8912	5789	7875	9854	8117	11712	6090	5811	11802	13223	5695	6390	17288	16095	2277	2655	13319	13866	1064	1315	910	1206	15327
s30	11978	8333	9801	9360	2522	4491	7939	7502	11526	13995	3816	2882	4386	3179	3300	2847	5273	4780	5646	5509	5978	6336	12173	10099	13011	12929	11721	7697	13215	11804	11243	16979	7322	6029	15405	13007	5022	6182	19650	19853	2665	2474	15276	16077	955	1274	831	1296	17084
s31	9012	8541	9045	8339	2264	3482	8117	7067	11727	12317	2779	2905	3477	2380	2963	2813	4386	4439	4716	4598	5404	5174	10401	10152	10469	12968	6822	5297	8504	9030	8744	12134	6422	6546	10412	10810	4515	5406	15165	13937	2299	2539	11648	12539	1144	1373	863	1253	14610
s32	10960	9272	11933	9604	2760	4229	10043	9529	14717	14845	3782	3165	4799	3434	4664	2466	4982	5294	5504	5160	6809	6702	12544	10611	11775	15529	9737	7214	12293	11179	8993	14121	7667	7643	15795	13658	7545	6809	17644	19028	3396	2946	15409	15953	1161	1480	953	1463	16285
s33	11841	9486	11498	10080	2485	4229	9655	10080	14916	15480	4879	3030	4587	3975	4058	3096	4962	4954	5033	4924	5980	6415	10718	10838	13572	16922	8809	7534	8914	9880	8344	12329	6079	6145	13335	13724	5659	5669	16995	16347	2414	2924	12959	13191	1127	1300	750	1069	15280
s34	14088	11933	13549	9808	2283	5382	16040	13583	25872	19458	2908	5225	3508	2581	5170	4515	6148	4702	6666	2849	6768	5977	9765	16120	11019	21171	3440	2207	5484	11193	4468	12630	6921	5450	7232	11980	5765	2857	17251	10075	770	1174	12588	11525	1501	2054	536	2313	15147
s35	10960	9272	11933	9604	2760	4229	10043	9529	14717	14845	3782	3165	4799	3434	4664	2466	4982	5294	5504	5160	6809	6702	12544	10611	11775	15529	9737	7214	12293	11179	8993	14121	7667	7643	15795	13658	7545	6809	17644	19028	3396	2946	15409	15953	1161	1480	953	1463	16285
s36	17808	13459	9123	13153	1127	4158	9625	12005	16329	21919	2585	2096	3474	2555	5960	4592	4439	4889	3882	1998	3597	4519	11946	13765	17630	24848	9625	5850	9480	13570	10054	15483	9174	9510	16465	13540	6386	1403	13064	16082	2500	387	15011	16069	1803	1225	1340	791	21970
s37	9057	6587	7716	7515	1844	2817	6503	6891	9711	9741	2697	2149	3323	2622	2444	2005	3660	3627	3904	3677	4360	4589	10350	9732	10480	14114	5873	4474	6861	6539	6308	9332	5179	4868	7521	8333	3362	3662	13305	11695	1326	1830	10349	11339	689	739	595	685	10832
s38	9951	8012	9036	8260	1890	3762	8346	7037	10508	11385	2652	2160	3375	2438	2642	2147	4474	4260	4230	4155	4913	5140	8879	9274	10594	13740	6582	5234	8069	7463	5991	9964	5970	5635	9210	8954	4975	5151	9090	12876	2790	2556	9060	12934	1223	1212	872	1440	9752
s39	8888	8277	7326	8712	2059	3584	6996	5629	11436	11447	3203	2899	3719	3194	2995	3385	4527	4388	4225	4112	4845	5142	10071	9014	11316	12417	6760	5895	7440	7260	6497	10881	6407	6029	11344	10506	4467	5325	14087	12743	1874	2040	9689	10849	887	1084	619	827	13547
s40	8528	7283	8592	7727	1992	3295	6555	6261	9668	11059	3135	2674	3702	2824	2922	2567	3983	3844	4525	3857	5922	5528	9381	9756	9419	11665	8138	5631	9143	7589	6574	11489	5785	5534	12314	9782	4727	5207	16279	14569	2130	2451	10332	12360	987	1185	612	893	13320
s41	11462	10658	9720	10519	2687	4626	9968	8230	12670	13664	4309	3846	4315	3488	3614	3396	4675	4697	4964	4746	5766	6289	14099	13294	14997	16842	8012	6419	9799	8584	8650	12992	9045	8807	13191	13592	5444	5342	16424	16298	2432	2483	12047	13088	1401	1427	713	972	15992
s42	10455	7307	8684	7116	2151	3308	6747	7020	11100	12014	3582	2652	2952	2618	3029	2552	4120	3809	4013	4159	4084	4517	9002	9083	10759	14487	8166	5138	6615	6623	5747	8725	6126	5980	10480	9124	4825	5684	13335	13144	2567	2487	13452	12477	1189	1401	829	1206	14445
s43	11217	9400	10718	9983	2517	3591	10309	7607	12270	12681	4202	3878	3610	2792	3745	3467	4652	4395	4401	4748	6225	6224	10557	9895	12539	15368	7926	6306	9615	10673	7872	11607	7281	6314	12882	11324	6332	6704	14057	15619	2564	2549	11779	13656	1142	1262	754	953	13969
s44	8237	6578	7877	6878	2106	3310	5374	4994	8657	9878	2595	2385	3908	2805	2597	2451	3810	3608	3840	3814	4245	4594	8954	9036	9102	10877	6394	4965	6585	7789	6996	10690	5310	5342	9629	9557	4821	4590	14363	12773	2256	2250	11219	12280	990	1024	704	1026	13431
s45	10165	7380	8835	9205	2432	4077	8224	7896	11706	12885	4161	3321	3400	2603	3428	2967	4465	3874	4253	4200	4907	5436	11586	11370	12306	13260	8969	6602	10517	9450	6812	11980	6882	6012	12051	12074	4894	6132	15270	15460	2702	3068	13133	15531	1047	1394	908	1219	14577
s46	10358	7907	8976	8558	1964	3389	7547	7184	11342	11573	3516	2804	3231	2376	2815	2352	4129	4052	4427	4463	5100	5924	9072	10120	10034	12790	6977	5519	9263	9437	7735	10607	6428	6482	11560	12544	5541	5764	16778	13739	2993	2460	12900	14532	1150	1212	795	1120	14385
s47	9171	8119	8667	7889	2200	3739	8378	7879	11603	13731	3066	3276	3360	2459	2856	2880	3930	4253	4245	4544	5200	5762	10017	11219	11539	14860	8130	6167	9492	8834	8820	11412	5957	6132	13139	11309	5498	6042	15199	14127	2787	2957	12167	13553	1129	1189	773	1050	15057
s48	9979	7294	10159	8684	2037	3233	7986	7607	11408	12287	3450	3314	3653	3250	2839	2873	5147	5256	4729	4364	5114	5738	10913	9921	12242	14003	7360	5571	11655	10872	9165	12396	6362	6066	14880	13189	5751	5852	16086	15261	3105	2594	14907	14747	1484	1459	1035	1390	18160
s49	11119	8894	11504	10928	2350	4002	10245	10463	14475	15786	4994	5099	4744	3825	4148	4189	6216	5805	5130	5479	7084	6944	12968	14967	21171	18154	8344	7283	8678	11586	11076	13238	7210	6906	14768	12867	6895	7043	17031	16767	3274	2933	13770	14642	1178	1510	904	1110	17640
s50	10769	7731	14826	10107	4326	7088	10170	9700	22343	26112	3561	5322	4754	3599	4958	3769	4988	5014	4671	4748	7193	8592	4774	12195	6310	17965	5042	3325	8920	8550	8807	10838	7320	6445	14005	12730	5252	5965	18687	16049	2584	2314	11562	14072	1094	1388	666	1266	18507
s51	9087	7157	9747	8909	2247	3780	8783	8249	13622	13870	3734	3434	3074	2414	3139	3250	5234	4770	4380	3889	6194	6319	12353	12104	12833	15670	8192	6143	8946	8669	8339	12702	7300	6090	12904	11399	5115	5764	15683	14790	2462	2429	11642	11856	1071	1405	694	1069	15402
s52	9719	8730	8747	7956	2230	3124	9169	7924	12074	12852	4137	3233	3430	2922	3906	3132	4564	4409	4932	4005	4956	4806	9910	9692	11929	15070	8192	6589	8204	7067	9164	13602	6831	6454	10832	10064	5196	4705	14567	12578	2558	2622	13064	14063	1052	1161	734	960	15737
s53	9719	8730	8747	7956	2230	3124	9169	7924	12074	12852	4137	3233	3430	2922	3906	3132	4564	4409	4932	4005	4956	4806	9910	9692	11929	15070	8192	6589	8204	7067	9164	13602	6831	6454	10832	10064	5196	4705	14567	12578	2558	2622	13064	14063	1052	1161	734	960	15737
s54	9304	10118	9945	9152	1992	3591	7911	9822	12323	13439	3662	2584	3867	3820	2888	2384	5142	4890	5376	4581	5016	5027	11185	10845	10607	12467	7660	5999	7761	9201	7045	12229	7688	7041	9565	9857	5370	5841	14157	14644	2963	2753	13414	13844	1075	1255	876	1090	14487
s55	9910	7022	9850	8841	2837	4019	9372	9355	13656	14239	3130	3019	4193	3297	2749	3300	4212	3882	5129	4499	5226	5661	10360	10547	11845	15595	7679	6527	7639	8766	7979	10645	6771	6585	13540	11625	6344	6216	14772	15932	3364	2790	13373	14509	1242	1313	882	1129	15584
s56	10514	7763	8901	7671	2567	3617	6968	7817	12173	12447	2370	2592	3334	2995	3222	3216	4120	4390	4178	3951	4712	4694	9857	9239	11164	13581	6160	4739	8487	7620	6951	13379	6280	4915	12522	13512	6077	5837	15315	14592	2502	2333	12666	13242	1202	1281	893	1088	15147
s57	11622	9777	13197	11417	2867	4412	8579	9083	15265	15647	4782	3237	3880	3184	3216	3094	5241	5605	5025	4604	6563	7028	12102	13167	15060	17040	9767	7189	10193	9435	8537	12602	7697	7075	14316	12754	5762	6113	20841	18717	2727	2487	14648	16199	1174	1311	990	1185	17933
s58	9398	7658	7632	7499	1934	2655	6960	6119	10095	10637	2637	3662	3424	2337	2639	3038	4084	3715	4446	4024	4244	4167	8864	9499	9595	12372	7977	5511	8794	7926	8100	10568	5918	5987	12540	10902	4832	4581	15559	13849	2359	2779	10334	11685	912	1242	741	1028	13934
s59	10268	8594	10797	9297	2245	3604	7097	5982	11730	12480	3141	2775	2940	2959	3017	2605	4504	4549	4056	4080	5232	5612	9730	10140	10932	13403	8110	5429	8665	7694	6452	10140	6004	5819	12402	10774	5442	6407	14980	14290	2901	2575	11759	11783	1007	1062	814	900	14492
s60	9480	8325	8164	8115	2250	3932	8665	7484	11807	12098	3473	2279	3486	2879	2442	2436	4367	4619	4962	4530	5760	5582	10131	9452	9863	13109	6975	6469	8603	8327	7881	10890	6405	5485	10902	11115	4489	5335	14573	14305	2243	2434	11989	12209	1154	1461	844	1015	13472
s61	7767	6959	8040	7814	1859	2712	6932	5359	9214	9912	2496	1930	3079	2194	2762	2147	3970	3732	4281	3779	4534	4472	9445	8809	9679	10454	6409	5361	6810	6762	5202	9120	5235	5459	9325	8588	3867	4388	12032	12134	1763	2344	11318	11279	936	1077	728	968	12672
s62	4629	2850	4940	6166	1641	2505	3817	3644	7427	5993	1883	1244	1831	1158	1779	1089	3593	3454	3973	3489	5199	7081	5976	4922	6598	9758	4387	3092	3903	5026	2660	5147	4663	3403	7064	10501	6926	6995	7029	5682	1382	1693	8843	10518	1693	1278	933	1589	19308
s63	9816	7394	9576	9263	2359	3464	7397	6972	10967	11329	2805	2344	2969	2312	2894	2160	4075	4049	4690	4373	5190	5010	10272	9548	10776	13334	8269	6173	9102	8669	7397	12432	6229	6891	11007	9240	5082	5254	14710	14001	2762	2798	10780	11633	1035	1131	713	852	12807
s64	5184	3492	8389	7673	525	1175	6017	4999	5207	4809	3190	1758	3901	2635	2991	1926	7788	4975	9157	4210	11123	5371	10867	7212	11427	10465	10774	3756	11511	7432	9253	13706	6237	5780	28715	21166	7353	3272	23457	20939	2104	2689	21217	28759	2436	2146	1306	1755	37794
s65	10060	7800	8494	8104	1654	4255	8144	8059	9957	15469	3321	2942	2794	3235	3184	3025	3077	4251	3040	3880	3435	4575	9589	9495	12297	15822	8494	6488	8633	9576	6469	10407	7386	6192	11963	12434	5024	5577	15372	15604	2097	2624	9985	12891	951	1219	730	921	13019
s66	10060	7800	8494	8104	1654	4255	8144	8059	9957	15469	3321	2942	2794	3235	3184	3025	3077	4251	3040	3880	3435	4575	9589	9495	12297	15822	8494	6488	8633	9576	6469	10407	7386	6192	11963	12434	5024	5577	15372	15604	2097	2624	9985	12891	951	1219	730	921	13019
s67	9066	7889	7185	6597	2256	3422	8549	7232	12278	12353	3705	1890	3167	2622	2361	2350	4084	4050	4279	4114	4939	5265	8759	11702	14265	16765	6987	5033	8159	7397	4718	8312	4137	4782	9870	8477	5074	5817	10624	10049	3347	3921	12269	12801	1296	1345	865	1112	12644
s68	17443	19543	11882	9859	1114	2747	10892	13196	25434	28321	2840	5170	4851	3877	3962	3877	7487	6339	7822	2742	9238	8141	8796	18637	19861	27020	4842	6823	3754	11823	7351	14998	6836	7763	8188	12290	4171	2827	18416	12158	1119	1174	16869	19470	808	2857	1165	2730	16282
s69	10521	8777	10677	8635	2914	4283	10791	9270	15115	15162	5024	3495	4049	3713	4915	3807	4334	4332	4889	4454	5489	5877	11010	11744	17299	19409	7110	6690	10553	8730	5511	12299	5879	5663	12540	9882	5715	7182	8010	9797	3567	4184	10975	13602	1305	1710	1305	2916	20774
s70	8320	8633	8554	8132	2453	3300	9525	8084	12055	13045	3469	3276	4208	3312	3152	3878	4964	4737	4905	4380	5123	5519	10829	9709	11445	15132	8112	6128	9025	8573	6381	13514	6188	5824	13262	10842	4930	5234	14384	16097	2282	2592	12739	14005	1060	1487	970	2054	15062
s71	8320	8633	8554	8132	2453	3300	9525	8084	12055	13045	3469	3276	4208	3312	3152	3878	4964	4737	4905	4380	5123	5519	10829	9709	11445	15132	8112	6128	9025	8573	6381	13514	6188	5824	13262	10842	4930	5234	14384	16097	2282	2592	12739	14005	1060	1487	970	2054	15062
s72	11843	9784	10172	10345	2335	4037	10470	9413	11603	13467	5234	3570	4191	3117	3724	3239	5177	4812	5059	4913	5880	5931	10579	11114	14033	16844	9119	7330	9698	10347	7343	12704	7892	6555	15332	13808	6525	7296	17436	15259	2262	2920	13242	15432	932	1257	799	1050	15649
s73	11843	9784	10172	10345	2335	4037	10470	9413	11603	13467	5234	3570	4191	3117	3724	3239	5177	4812	5059	4913	5880	5931	10579	11114	14033	16844	9119	7330	9698	10347	7343	12704	7892	6555	15332	13808	6525	7296	17436	15259	2262	2920	13242	15432	932	1257	799	1050	15649
s74	10444	7630	8723	8367	2408	3773	7045	8181	12490	12914	3263	2599	3623	2524	2984	2031	4911	4733	5421	4184	5252	5575	9347	10622	10345	12342	6460	5567	9214	7943	6490	11890	5717	5950	14616	9149	4581	4772	17550	16605	2552	2228	11642	13767	1305	1375	865	987	13309
s75	10879	8925	10628	9649	2822	4244	8939	8496	13574	13009	3390	3032	4330	2841	3540	2918	4673	5157	5016	4654	6402	6068	11854	11065	11586	15516	8820	6094	9915	10202	7823	12570	7956	7787	12795	11498	4958	4765	16960	16632	2950	2706	13067	13523	927	974	715	1026	14712
s76	9784	8753	10937	9872	2299	4435	8247	8423	12786	13705	3561	3122	3846	2880	3428	2819	4712	4853	4189	4043	5258	5556	12027	11277	11393	15308	9855	5768	10206	10714	6719	12437	8460	7146	12158	11337	5661	5629	17157	15910	2734	2695	12623	12782	1262	1382	709	1221	15599
s77	8440	6329	7285	6074	1832	3068	5230	4821	7259	8760	2389	2239	2370	2609	1641	1834	3270	3449	4060	3698	3750	4553	7499	7643	8280	9726	6092	4574	4750	5537	5562	9222	5249	4497	8789	7879	3237	3972	11310	10943	1461	1860	8571	10032	895	1030	574	992	11599
s78	12169	9081	9938	8219	1335	2175	10244	9222	16056	18402	3797	3520	4334	3872	5102	4581	3490	3542	2871	2939	5841	5894	11074	13632	23016	21216	9959	5712	12014	10656	8055	14725	7275	7545	13084	15587	7140	6360	11674	14708	2867	2564	10463	13549	1566	1435	634	1373	15527
s79	9959	7997	10285	8194	2635	3289	8693	8616	12390	12968	3389	2618	3827	2779	2997	3139	4952	4802	5014	4602	5603	6047	11447	10979	10440	13401	9079	7379	8959	7836	8159	11672	6282	6405	12998	12152	5582	5779	16208	15280	2918	2235	13609	13039	1118	1249	1007	1388	17099
s80	10442	7742	9754	8809	2460	4219	7757	7080	12677	14522	3203	2817	3158	2144	3814	2714	4399	4212	4470	4356	6209	6237	10274	12471	12244	14346	7302	6029	9484	8344	6576	10176	6565	5819	13590	11798	5547	6930	15529	15891	2712	3075	12764	13662	1165	1405	895	1129	14339
s81	9229	7041	9874	9175	2610	3900	7701	6525	11007	13019	3308	2522	3462	2837	2755	2640	4384	4259	3885	4187	5119	5607	10945	10815	11515	12614	8204	6229	8586	9685	7382	11185	7540	6627	11502	10433	5168	5873	15685	13770	2500	2650	11927	13013	1035	1245	769	1161	14612
s82	12644	10236	11841	11839	2618	4500	9582	9720	15687	17009	4928	4067	4995	4127	4388	3094	6100	5534	5335	4870	7300	6578	11950	13367	15044	18060	8374	6319	10737	9990	8430	10305	6885	7746	15368	13125	5747	6649	17299	18865	2504	3364	13358	15535	1004	1469	899	1229	16632
s83	12902	11192	12625	11346	2616	4026	9000	10071	15120	15158	4410	3456	5063	3544	4459	3252	5706	5886	5805	5207	7433	6550	14142	11879	14910	19525	9409	7639	11132	11740	9734	15034	7827	7071	16521	15756	6040	6747	19283	19487	2667	3012	17427	17114	1448	1733	700	1146	19094
s84	10165	9096	9280	8552	2862	3662	9584	8556	11967	12224	3094	3107	4455	3660	2689	3505	4575	4602	4849	4347	5363	5543	10800	10185	13755	16652	9749	7035	11192	9147	7686	13150	8085	6529	12979	12068	5957	6741	15317	15784	3244	3308	15164	13598	1384	1446	1007	1590	16924
s85	9203	6554	8007	7709	1727	2954	7013	6655	10589	11607	2740	2335	2939	2444	2239	2708	4604	3959	4482	4109	4688	4455	8633	9032	11444	13225	8312	5327	7260	8029	8260	12713	7088	5794	11792	9227	6203	4887	17228	14954	2539	2228	12692	12887	1268	1079	1043	960	14697
s86	10204	10082	10742	11650	3640	6077	9105	10930	14922	17490	4337	4506	4349	3364	3929	3840	4750	6417	5012	5159	6792	7127	13645	17385	15651	24419	12377	9435	11389	13137	10112	13219	9640	9479	10172	12758	5637	7855	13962	15962	4289	2807	22587	18137	1285	2286	902	689	21060
s87	9917	8796	10037	8912	2222	4330	9546	10077	13770	13562	2790	2837	4185	2850	3529	3059	5265	5337	4555	4557	6094	6102	12499	10694	13030	14648	9014	7189	8969	7662	8192	12655	6865	5999	12165	11202	4992	5594	14676	14914	2224	2327	12147	12902	1094	1124	831	1110	15465
s88	11790	8397	9640	8279	2280	3814	8007	7934	12077	12670	4817	3231	4056	3259	3589	2689	4784	4620	4174	4701	4660	5712	9419	8993	11511	14580	9293	6430	8262	8033	7185	12032	7367	7315	13714	10789	5535	5631	13075	14594	2106	2492	11457	13341	1005	1022	705	940	14102
s89	9044	7139	7949	6777	2324	2999	6053	5359	8828	8849	2374	2519	2474	2267	1926	2554	2749	2985	3464	3147	3859	3893	9542	8545	10362	11440	7855	5999	6199	6882	6312	11670	5886	4184	8993	7744	2933	3779	9143	9565	1266	1671	7592	8952	771	1002	469	698	11637
s90	12139	10013	12089	11267	3432	5807	11273	9407	17339	16754	4255	4392	4641	4189	4062	3426	5481	5089	5595	5496	7557	8483	13889	12327	14007	17650	9919	8159	10287	12141	8972	14084	7382	7448	16557	17689	7322	7320	19765	19281	3644	2862	14629	14764	1345	1215	840	1174	17059
s91	14095	10214	10583	9724	2710	4362	9319	10251	14162	14340	4184	2635	4247	3242	2828	3047	5841	5333	5361	4613	5742	6122	14762	13437	15047	19367	11721	8115	10904	11603	8168	15565	9837	8462	15308	13954	9760	6745	19527	18205	2494	2993	12891	15599	1365	1364	914	1395	17985
s92	10407	7986	8905	8029	2318	3484	7004	7568	11329	12413	3252	3122	3730	2607	3094	3029	4320	4236	4384	3975	5125	4832	10639	10587	11457	14085	8552	6690	9231	8155	7019	10755	6959	6327	12143	11078	5580	5498	14717	13868	2369	2804	10692	12179	1052	1125	927	1118	12844
s93	10043	8357	10769	9745	2541	4469	7806	7664	12285	13609	4414	3387	3462	2871	2880	2715	4639	3951	4414	3831	5562	5324	9743	9589	12132	14595	7487	5117	9524	7649	6162	12809	7431	7101	13722	11202	5080	5472	17097	15480	2849	2588	11339	13819	1082	1289	872	1103	15990
s94	15621	14760	14492	13647	3222	5912	11586	11432	22320	23520	5545	5609	7622	6314	5127	7285	6130	4645	6722	6083	9179	8592	11903	10992	19949	24089	4519	3769	7965	9304	3087	10977	7382	6880	11037	8892	6775	6977	8847	11856	2346	2485	16907	15981	1217	1382	1077	998	22898
s95	11256	9884	12027	10249	3492	4874	9336	7116	15315	15102	3330	3651	4279	4176	3990	3488	4645	4990	5444	5410	6434	5976	11318	12197	15456	17970	10894	7675	6947	9074	7227	11768	6139	5620	11295	11897	6304	6267	14922	13392	2944	2528	10836	11804	1292	1427	758	1116	12938
s96	12767	9762	12336	11262	2721	4410	10264	12134	14464	14907	4780	3704	4350	3379	4127	3310	4868	5324	5204	5151	6726	6711	14277	12366	14207	17325	10097	8007	11511	9503	8384	14061	8609	7635	13922	13197	6775	7425	18104	18323	3859	3850	16185	16371	1491	1665	1101	1485	18432
s97	9786	8721	8854	8607	1982	3704	7675	7339	11997	11940	3267	2299	3070	2565	2279	2215	4133	3756	3940	4020	4902	5489	9814	8910	12784	14087	7699	5569	7529	8924	6634	10302	6310	5620	10394	10759	4799	5834	15044	14513	2421	2865	11558	11847	1028	1034	737	1112	13701
s98	11661	7165	10622	8309	2650	3981	8159	9353	12122	13643	4536	3347	3870	3120	3908	2515	4819	4328	4694	4680	5768	6055	10232	9218	12917	16230	9550	7124	8916	8766	7114	11085	6704	5511	14507	12597	5457	6255	17867	18143	3567	3477	13109	14770	1069	1476	816	1103	14672
s99	11517	9786	10630	9096	2434	4487	9407	9420	14016	14264	4330	3906	4673	3844	3940	4017	5224	5301	5541	5237	6010	5635	11440	11147	12083	15552	9505	6694	10107	9630	7649	12584	6949	6259	13242	12430	6154	6810	16836	16712	3225	3130	14916	16797	1116	1187	908	1397	15398
s100	11517	9786	10630	9096	2434	4487	9407	9420	14016	14264	4330	3906	4673	3844	3940	4017	5224	5301	5541	5237	6010	5635	11440	11147	12083	15552	9505	6694	10107	9630	7649	12584	6949	6259	13242	12430	6154	6810	16836	16712	3225	3130	14916	16797	1116	1187	908	1397	15398
s101	11734	9576	12085	10804	2978	4547	11475	9983	15190	15111	4440	3764	4485	3085	3278	4407	5699	4810	5027	4560	6040	5573	12784	10463	12585	14340	9327	6565	10215	10885	7716	12171	7268	7217	14029	14020	6479	7352	20507	17519	3074	2534	14453	16002	1274	1204	895	1195	18675
s102	9855	8346	8470	8303	1962	3482	7508	8100	11215	11500	4052	3197	4005	3269	3004	2768	4637	4380	4343	4114	4797	4463	10939	11537	12488	15284	9102	7469	10845	9554	8434	12996	7170	6544	12456	10470	4898	5074	15788	14794	2331	2365	12179	12555	1274	1347	929	1317	15132
s103	9696	8012	9994	9029	2639	3786	8487	8067	14097	12959	3539	3396	4075	3017	3299	2787	4630	4984	4727	4362	5976	5468	12312	10200	12374	13898	7709	5826	9831	9327	6465	12349	5924	6173	13572	10343	6900	5601	16007	13412	3113	2790	12261	11312	1056	1069	739	917	14189
s104	9383	6381	8279	5847	2172	3289	7622	3964	11811	7317	3460	1474	3527	2067	3362	1185	4538	3786	5070	3741	4842	4125	11340	5610	11625	10484	9773	4639	9887	5665	10799	8594	7949	5384	12501	11384	5888	7152	15449	13800	3167	2667	12694	10838	1187	1259	880	1075	15314
s105	9383	6381	8279	5847	2172	3289	7622	3964	11811	7317	3460	1474	3527	2067	3362	1185	4538	3786	5070	3741	4842	4125	11340	5610	11625	10484	9773	4639	9887	5665	10799	8594	7949	5384	12501	11384	5888	7152	15449	13800	3167	2667	12694	10838	1187	1259	880	1075	15314
s106	11361	8389	8610	7800	1814	2914	7823	9319	11151	13167	3700	2811	3126	2931	2637	2895	4279	4197	4251	3990	4290	4424	9419	11230	10454	15407	8689	7071	7439	8715	6255	11490	6495	6353	11226	12642	4778	6014	14247	18092	2430	2952	12128	13322	1163	1409	794	1350	16913
s107	8155	6870	9034	8412	2519	3152	7834	8155	11616	11689	3902	2588	3057	2924	2367	2820	4467	4094	4062	3867	4727	5010	10823	11273	11920	12760	9475	6124	9096	8907	6687	11757	6454	6509	10176	9359	4311	5147	14430	13079	2220	2054	10386	10440	994	1131	467	782	13140
s108	10986	9749	10829	9499	2275	4131	8303	7437	11871	13802	4035	3615	4362	3044	3512	3443	5025	4971	4815	5024	6057	6145	11625	12426	13431	15473	11264	7240	9479	10082	8035	14963	7649	7898	14048	13789	5886	5884	17864	15674	2888	2871	12621	12413	1148	1345	936	1253	14850
s109	9867	8267	8843	8635	2219	3825	7727	7515	9259	10583	3829	2744	3177	2357	3060	2445	4071	3897	4332	4679	4967	5612	8824	9402	11663	15017	8781	5667	6992	6942	5708	10114	7223	4517	11995	11020	4748	5442	13639	13446	2460	2579	10094	11513	1026	1225	739	1084	14102
s110	11340	7103	8271	7320	2001	3090	6139	6805	9154	10244	2895	2569	2858	2721	2727	2721	3869	3660	3979	3347	3762	3705	8370	7634	10650	13424	7523	5138	6642	6372	6135	8972	5909	5485	9263	8676	4395	4352	12257	11757	2410	1913	10324	11080	1101	1234	664	1002	12522
s111	12051	11055	12055	10958	2727	4979	11044	10330	16043	16472	4110	3330	3332	2059	3529	2633	4701	4592	5687	5076	5880	6177	11849	12689	14914	19020	10169	8487	13716	12617	9179	13712	8305	6660	15192	13973	5179	6400	16407	16508	2914	2760	11822	13956	1069	1549	889	1178	19133
s112	7904	7097	8762	7566	1928	3364	7748	7328	11610	11959	2875	2802	3512	2727	2295	2453	3899	3630	5359	4559	6492	6244	9516	9540	9839	11826	7071	5346	7821	7242	6488	10575	6104	5663	9329	9212	4476	4632	13465	12070	2669	2367	9177	9899	1334	1452	953	1155	13150
s113	10049	7789	8937	7815	1994	3623	7251	6357	10725	11410	3820	2273	3539	2691	2751	2312	4995	4388	4566	4452	5121	4952	9467	10401	11789	13484	7795	5565	7935	7500	7086	11959	6225	5434	11106	10836	5022	5250	14434	13514	2535	2785	10941	12471	1082	1343	1058	1356	13019
s114	8449	6975	8811	8537	2318	3293	6977	7133	12192	12705	3156	2374	3550	2689	3347	2331	4206	4045	4553	4395	4493	4780	8700	9008	9362	12074	7017	5925	7943	7281	5796	9934	6460	5759	11429	9572	4787	4954	15338	14689	2554	2772	12885	14835	872	1013	852	1067	15884
s115	8475	7043	8580	7992	1975	3600	7911	6784	10380	11054	3135	2712	3514	2879	2759	2954	4536	4545	4309	4064	5003	4975	9690	11202	9623	12855	8528	6700	8612	8127	6891	10583	7206	6077	12139	10311	5877	6310	16534	14944	3306	2811	13677	13868	1242	1538	970	1532	15700
s116	10973	9595	10782	10577	2320	3749	9452	8616	13041	12987	3285	3096	4184	3359	3694	3019	4785	4628	4778	4692	5828	5942	11444	11080	12550	16157	8637	5954	9638	9062	7197	10952	6602	6392	13725	12893	5129	5918	13973	14249	2397	2717	13182	13806	1139	1335	743	1041	15962
s117	9899	7939	9366	7832	2614	3497	8312	7495	10611	11442	3002	2400	3906	2822	3259	2117	4395	4429	4296	4386	4585	5012	10244	9827	12745	15364	8093	6548	8942	9216	6852	11376	7412	6945	12224	12229	5738	5978	16529	14961	3235	2775	13844	13716	1221	1575	779	1024	15752
s118	9899	7939	9366	7832	2614	3497	8312	7495	10611	11442	3002	2400	3906	2822	3259	2117	4395	4429	4296	4386	4585	5012	10244	9827	12745	15364	8093	6548	8942	9216	6852	11376	7412	6945	12224	12229	5738	5978	16529	14961	3235	2775	13844	13716	1221	1575	779	1024	15752
s119	9702	8331	9244	8627	2080	3795	7984	6315	11190	11190	2905	3025	2937	2361	2699	2230	4412	3921	4407	4499	4823	5249	10395	10146	11324	13161	6049	4986	7133	7448	6820	10917	6345	5534	10679	10883	5121	5174	15164	13454	2607	2987	12449	12104	1056	1277	775	1135	14185
s120	14920	11815	7446	6561	119	537	14562	16114	15874	10538	3047	7750	9608	6452	6726	5852	2993	3162	2710	2785	7504	8374	10995	10146	15096	20235	5228	3610	6805	7765	5451	7371	4140	4180	11890	11224	5123	5648	9921	11468	2474	2196	7562	10024	1097	1229	756	1200	13110
s121	16562	16870	12104	12649	1892	2303	13887	20335	23948	24482	3473	5830	5449	3387	7311	4536	4157	3735	4523	3855	5685	4808	12934	15758	16307	27636	6229	3818	10806	13322	5048	12405	7649	7345	9300	9644	6049	5736	11346	20346	2547	2425	20130	16767	1251	1692	1157	1317	15788
s122	10052	8545	9154	8020	2579	3644	8729	7236	11262	12261	3458	2464	2783	2864	2674	2897	4710	4722	4575	4242	4967	4774	11515	10131	12254	13401	8016	6700	9188	8700	7926	12576	8001	8175	11316	9302	5954	6424	16084	14862	2912	2792	13767	14024	990	1195	874	1292	14702
s123	10052	8545	9154	8020	2579	3644	8729	7236	11262	12261	3458	2464	2783	2864	2674	2897	4710	4722	4575	4242	4967	4774	11515	10131	12254	13401	8016	6700	9188	8700	7926	12576	8001	8175	11316	9302	5954	6424	16084	14862	2912	2792	13767	14024	990	1195	874	1292	14702
s124	10540	9529	10909	8937	2549	3495	9012	9205	14498	14997	4210	3600	3252	3062	3539	3447	5275	5429	5078	4735	6820	6593	11580	10934	12812	16322	8974	5925	9561	9722	7315	12390	6818	8147	14256	13874	6660	6274	18722	18302	2935	2181	15524	16199	1412	1320	925	979	16692
s125	10455	9458	10943	10574	2464	3473	9638	8877	13461	13394	3767	3111	3685	3349	2834	2552	5020	4493	5123	4474	6758	6182	13455	12227	14290	17680	8702	6728	10485	8805	8423	13934	7568	7613	13722	12809	6842	6411	15752	14820	2809	2102	14057	13722	1330	1285	932	1208	17151
s126	9717	8620	9880	9315	2046	3450	9469	6934	12929	13294	3587	2984	3576	2429	3087	3387	4409	4148	4116	4030	5070	5464	9152	9231	11980	13437	7184	5492	8299	7493	7097	10992	6432	5200	12717	10709	5468	5294	15064	13814	2322	2577	10926	11599	985	1154	767	1002	15707
s127	8777	6600	8624	9345	2074	3222	7564	6610	11924	12899	2535	2920	3158	2667	2744	2882	4266	4071	4240	3921	4725	4802	8991	9698	11355	12225	6752	6077	7388	6820	6205	9529	6081	6068	10208	9464	4386	4495	13560	12488	2119	2247	9655	10050	852	927	509	820	12831
s128	13855	9443	11012	9807	3060	4350	10311	9407	12694	15145	3342	3527	4590	3182	4262	3593	5160	4634	4941	4919	5654	5717	9480	11907	13388	18606	10394	6996	11460	8061	8164	11798	9044	7358	12623	11633	6195	6085	17708	16566	2974	3113	14252	15250	972	1140	801	1155	15325
s129	10902	7686	9207	9327	1515	3107	8789	7907	9925	11099	4967	2599	5669	2007	4176	2393	7069	3816	5751	3839	4289	4274	12173	10245	14042	12750	6884	5370	12404	7680	6233	10727	5768	5580	16844	7952	7718	4474	17145	12524	2507	2174	14307	11237	1002	1129	666	893	12642
s130	12921	9387	10439	10131	2224	3679	6947	7292	13718	13236	4227	2835	3143	2475	3544	2961	4722	4309	4094	3750	4767	4761	11329	10184	12060	14481	8279	5695	9074	8843	7292	11022	6717	5219	13934	13257	5659	6237	14940	15679	2738	2925	12619	12368	1122	1257	672	930	12735
s131	10789	8552	9482	9585	2297	3822	9090	8091	12825	13542	3672	2781	3501	2982	3447	2408	4234	4215	4630	4080	5744	5363	10024	9527	9810	13988	7187	6396	10122	9627	7489	12282	6715	5685	12662	10915	4845	5127	15075	14727	2305	2290	11927	11879	966	1064	615	833	14500
s132	9998	7913	8877	8620	2202	3938	8744	8892	12404	14129	3677	3085	3655	3244	3274	3314	4639	4656	4319	4416	5552	5535	9640	9205	11275	12717	8196	6449	9518	8309	7572	11676	6580	6619	12398	10596	5365	5211	15317	13071	2522	2234	11997	11820	930	1259	653	1020	13746
s133	12304	9929	10744	9057	2678	3372	8952	8022	12370	13030	4395	2899	4082	3597	3552	2959	5192	4802	5087	4754	5753	5742	10412	10005	12704	16146	9207	5995	9066	9690	7817	11925	6750	6212	12960	12720	5927	6276	16682	16885	2918	2781	13429	13958	990	1137	906	1148	15488
s134	11018	9162	10056	8470	2862	3634	8354	8414	12220	12975	4154	2387	4022	2997	2942	2760	4335	4345	5035	4307	6282	5766	10491	10665	11777	16555	8031	6229	8194	8905	8290	11835	6192	6795	11940	11545	5054	4793	18323	14985	2552	2432	11725	12589	957	1037	615	854	14400
s135	13405	9314	9237	8877	2279	4090	9614	8423	12359	14297	3552	3047	3807	2862	3494	2558	4755	5037	5273	5400	5295	5832	12064	10163	14301	18064	9629	6992	10772	10277	7740	13009	8389	7137	14247	13377	6345	5774	17901	16572	2929	2830	14018	14243	1069	1452	925	1442	16838
s136	10495	7864	9552	8916	2402	3385	9199	8807	12707	13439	4617	3017	3332	2672	3332	2522	4787	5204	4469	4427	5691	5275	10032	10240	11695	14496	8723	5865	9767	8813	6786	13307	6372	6794	12578	12194	6692	6672	15392	15544	3387	3134	12660	13229	1054	1105	818	974	15745
s137	8691	6809	6816	6831	1545	3302	7127	6173	9617	10767	3600	3051	3520	2532	3634	2665	4388	3966	3990	3966	4519	4429	8046	9803	10630	12546	7184	5335	7680	8059	7487	10647	5616	4105	9854	9278	4139	4399	13958	12855	1967	1705	11380	11882	1037	1219	704	827	13210
s138	5882	4752	7808	6764	2402	3473	6809	6255	13112	12683	3771	2877	3584	2609	3389	2714	4240	3908	3863	3771	5035	4797	9960	10772	10568	14355	8637	6497	8048	7300	6959	11729	6310	6715	10804	10862	6130	5078	14057	16056	2980	3098	12497	16367	1071	1131	715	983	11744
s139	8087	7169	7742	7725	2115	3308	6735	5849	10461	11123	3282	2307	3060	2333	2567	2110	4024	3930	3735	3788	4776	5044	10337	9840	10512	12304	6154	5504	7806	7309	7641	10868	5633	6094	9818	8408	4367	4497	13377	12203	2001	2130	10356	10549	923	1120	700	1080	13274
s140	10154	8217	9794	9004	2535	4043	8800	8280	11288	13397	3739	3788	3173	2562	3222	2770	4189	4270	4219	3951	5762	5924	11404	10110	11399	13465	7982	6915	10056	9075	6269	10832	7037	6119	12987	11539	5181	4956	15169	14618	2888	2890	12685	11509	1236	1364	735	1232	15265
s141	9342	7266	8991	7508	2350	3304	6923	7739	11382	12135	3405	2822	3287	2648	3454	2558	4017	3584	3645	3381	5129	4962	9413	8714	10485	13262	8363	6107	7911	7302	6364	11147	6083	5472	10874	9329	5159	5052	14721	13090	2517	2217	10849	11419	1082	1086	690	829	13024
s142	9784	7605	8372	8519	1800	3814	7390	7020	11961	12357	3158	2569	2864	2862	3310	2100	4394	4307	4150	4150	4746	4817	8408	9589	10300	12632	8817	5455	7114	6818	5841	9152	5134	4652	10525	10144	5520	5567	11637	12471	2099	2237	10684	11560	869	1223	711	944	13739
s143	15732	11558	13405	11447	3610	5633	10819	10838	15987	17987	3809	3565	4634	4064	4099	3507	4857	4407	6122	5993	7424	7199	14552	13229	20661	21156	11457	6810	10709	9124	7585	11189	9899	7722	16043	19763	6407	7289	19630	19851	940	2526	19101	21565	1373	1448	340	1838	31941
s144	11196	9662	9760	9713	2661	3992	9944	7995	12323	13585	3829	2999	3861	3220	3554	3027	5573	5665	4499	5177	4883	5410	10677	11460	13733	17312	8635	5980	9507	9160	6141	12411	7799	7602	14400	12169	7272	6833	17342	17279	3951	3647	15499	16536	1429	1686	1335	1497	16373
s145	11196	9662	9760	9713	2661	3992	9944	7995	12323	13585	3829	2999	3861	3220	3554	3027	5573	5665	4499	5177	4883	5410	10677	11460	13733	17312	8635	5980	9507	9160	6141	12411	7799	7602	14400	12169	7272	6833	17342	17279	3951	3647	15499	16536	1429	1686	1335	1497	16373
s146	10731	7547	10682	9062	2220	4142	7915	7847	12368	12364	3636	3074	3090	2595	3317	3270	4544	4157	4247	4221	5310	6209	11879	10442	12077	13542	8339	7097	8652	9809	7086	11644	7905	6869	12612	11976	4915	5363	16480	14582	2622	3186	12732	13902	1530	1422	869	1180	13752
s147	8999	7844	10013	8974	2515	3788	7110	6546	11408	10774	2807	3252	3179	2412	2331	2955	4504	3782	4553	3696	5102	4656	9212	9008	11432	10889	7737	6327	8532	8359	7311	10808	6531	6042	11106	9876	4650	4754	15537	15885	2860	2522	12477	13759	1077	1140	809	1253	13399
s148	9014	6874	8650	8009	2130	3475	6274	6479	10722	10859	2832	2447	2929	2286	2873	2412	4401	4626	4019	3964	4699	5114	10435	10650	9381	10574	7005	4870	7984	7307	6310	9544	6434	5239	11027	10079	4504	4654	13210	13125	2273	2307	11768	12709	1049	1187	777	1037	14198
s149	13836	12141	12917	11674	3066	4984	10350	9390	21947	23260	4866	6029	6640	5462	6724	5260	8267	2959	9509	4984	7750	9775	10971	11717	16806	19960	3803	3869	8393	12299	6340	13105	9548	9642	13842	16917	6441	6507	21158	18345	3134	2322	15852	19710	1019	1879	1347	2421	25002
s150	10384	9689	14363	13821	1851	3407	12915	10806	20025	14393	7870	4877	7905	3902	7896	5599	5961	3034	4510	3825	7390	5085	17485	15449	20550	23159	6173	5727	11449	10770	5288	9677	10056	7782	11729	14837	3904	4952	18964	15807	2807	2715	13665	18224	1244	1208	1307	1585	28472
s151	15439	11147	12040	11121	3272	4964	10500	10380	16827	17706	4484	4628	5504	3599	4739	4349	6047	5550	6359	4909	6897	6859	14985	12790	15734	20708	9690	8040	11475	9518	9857	15512	8697	8661	15975	14232	6117	6479	20708	19731	2976	2886	15019	16694	1140	1311	805	1084	18820
s152	10615	8200	9512	10298	2288	4131	9053	8022	12861	14820	3589	3203	4105	3180	3807	2869	4802	4062	5014	4407	5635	5967	12306	11264	11738	14524	9032	6662	7305	9270	7547	13193	7262	6180	10731	10227	6385	6314	15137	14815	2942	2847	12977	13455	1139	1212	743	1202	15173
s153	2242	2793	6547	6295	1667	2869	6798	5352	10336	11428	3188	3016	1947	1652	2916	2724	2661	1975	3012	2336	3815	3494	5686	7016	7803	10816	5893	2985	8831	5693	5561	8955	4593	4545	10156	8966	5156	5757	11808	9860	1486	1634	9402	9198	925	968	571	820	12397
s154	11153	8802	8980	8892	2318	3587	9212	9201	11918	13090	4244	3154	3902	3192	3604	2856	4352	4714	3741	3642	4930	5168	10748	9659	13094	15497	9389	6477	8582	7304	6186	11779	6685	5719	12285	13084	5526	5610	15004	14670	2680	2455	11361	11569	1152	1262	861	1000	13452
s155	9407	7350	8089	7444	2339	3368	7011	7440	11592	10787	3030	2856	4159	2749	2830	2279	4724	4283	4532	4204	4722	4499	10097	10395	10191	11925	5372	5204	7913	7615	9794	9540	5391	4868	12212	9419	5001	4733	15475	12975	2299	2299	11134	10748	970	1092	795	1163	13590
s156	10800	9846	8963	9278	2406	3955	8245	7604	12270	12357	4107	3216	3756	2618	3840	2880	4572	4598	4658	4110	5087	5729	11136	11753	12977	15287	9179	6392	8762	8344	7772	11457	7605	6077	13656	13013	6145	6222	17727	15587	3212	3115	14665	13830	1152	1339	861	1260	14972
s157	10800	9846	8963	9278	2406	3955	8245	7604	12270	12357	4107	3216	3756	2618	3840	2880	4572	4598	4658	4110	5087	5729	11136	11753	12977	15287	9179	6392	8762	8344	7772	11457	7605	6077	13656	13013	6145	6222	17727	15587	3212	3115	14665	13830	1152	1339	861	1260	14972
s158	10487	8119	9681	9079	2378	3456	8267	8123	11588	12025	3167	2738	3242	2519	3351	2520	4555	4583	4581	4399	5243	5395	10069	9368	11543	14460	8404	7109	7716	8479	7654	12548	6141	5162	12285	10452	4641	5069	15162	14205	2166	2389	11031	12015	970	1144	747	1073	14264
s159	10199	9780	10649	10990	3038	4270	10435	9008	13305	12884	3704	3149	3687	3162	3430	2535	4742	4448	4904	4664	5892	6572	11601	11136	12660	14781	8864	6750	9990	9557	6955	12372	7193	6567	12509	12396	5162	5224	17007	15021	2612	2835	12017	12126	930	1101	724	985	15186
s160	9792	8067	9529	9113	2414	4159	7770	8153	13154	12735	4069	3351	3690	2946	3735	2682	4187	4287	4298	4409	5644	6597	11226	10605	11207	14727	9784	6420	9424	9025	6480	12780	7493	6959	12364	12235	4907	5112	15863	15915	2459	2318	10532	11147	979	1172	820	974	13684
s161	8350	6347	9550	8288	2629	3782	6510	6833	12180	12972	3012	1840	3809	3051	3434	2534	3707	4043	4602	4184	4859	5565	8609	8760	9533	11849	7896	5093	6957	7673	6149	9685	5099	4971	8980	8798	4990	4919	12912	13011	3006	2464	11517	10579	1067	925	921	876	14235
s162	10874	8200	11770	9486	2603	4191	7489	9152	12975	14185	3450	2382	3880	3117	3484	2714	4172	3872	4789	4311	5468	5580	10176	10405	11078	13452	8391	6098	9209	8264	8057	12621	6390	6597	12055	10924	5384	5562	17348	15792	2612	2710	12246	13832	951	1350	809	1217	13349
s163	3330	3692	7248	8463	1579	3496	7237	6385	8847	11172	3856	2631	1932	1564	2919	2522	2311	2858	2962	3288	3330	4250	8176	8012	10389	12537	4358	2722	8438	7230	6548	8945	5283	4799	9119	10156	4181	4992	12141	12878	1541	2354	12420	13926	1165	1052	625	785	11871
s164	10935	8100	9432	10131	2254	3576	8370	8112	11322	12246	4037	2348	3458	2639	3458	2573	4187	4210	4345	4615	4823	5470	11325	11592	12179	14402	8264	7039	10035	9591	7982	11524	6261	5777	11834	11376	4754	5224	16097	14809	2822	2882	11832	12323	1015	1384	754	1069	15555
s165	7787	7193	9141	7407	1969	3668	7163	6090	11014	11372	3002	2500	3488	2830	2790	2616	4105	3962	4227	3818	4913	5082	9345	8273	9649	11275	6711	5354	8084	7712	6379	9527	5575	4384	9195	10733	4894	5339	13763	13620	2691	2661	11753	12072	842	1004	687	857	11852
s166	10765	8198	9203	9405	2421	3460	8717	7324	11427	12214	3749	3666	3409	3132	3304	3492	4450	4283	4161	3870	5434	5459	9413	9210	11867	14419	8316	6064	8800	8057	7424	12449	6891	6308	12424	10845	5468	6405	13050	12979	2742	2862	12027	11937	1075	1334	745	1088	12908
s167	10465	7964	8946	8524	2520	3182	7770	7836	11554	11483	3210	2550	3720	2963	3160	2978	4703	4086	4815	4272	4581	4969	11207	9822	11382	13997	8241	6435	8395	7904	6874	11220	6932	6057	11494	10527	5567	6405	14894	15297	2798	3062	14290	15216	1148	1041	822	1056	14520
s168	9494	8114	8534	7688	2250	3379	7349	6842	10776	10598	3344	2826	4075	2972	3510	3066	4870	4260	4320	4435	4827	5380	10755	10701	10137	13150	7697	5472	8254	7729	6657	8910	5910	5629	10731	9899	4594	5318	12809	12837	2455	2432	11513	14048	872	1049	788	1086	12471
s169	13482	10986	12441	10842	3417	4748	11312	11680	15557	16795	5378	3368	4817	4110	4317	3825	5931	6272	5744	5547	6762	7191	10954	10484	14095	17755	8871	6953	9344	9203	8595	14809	6825	7941	15021	14511	6724	6165	17232	16917	3077	3025	14644	15025	1056	1305	752	1217	17269
s170	13482	10986	12441	10842	3417	4748	11312	11680	15557	16795	5378	3368	4817	4110	4317	3825	5931	6272	5744	5547	6762	7191	10954	10484	14095	17755	8871	6953	9344	9203	8595	14809	6825	7941	15021	14511	6724	6165	17232	16917	3077	3025	14644	15025	1056	1305	752	1217	17269
s171	10716	8455	8785	8564	2661	4782	8543	8322	12289	14376	3045	3105	3158	2787	3809	2460	4320	4765	4491	4765	4701	5582	9799	9647	11387	12469	8162	5864	8419	7553	6955	11479	6884	6104	12130	11091	5524	6023	14882	14809	2614	3032	13170	14384	1011	1270	767	1339	16562
s172	11170	8526	10845	10305	2807	4587	9917	9668	14687	14076	4139	3426	4105	3075	3246	3692	4915	4605	5194	4697	6010	6469	11076	12497	12788	15801	9906	7197	10928	9709	8820	11678	7000	8355	14331	13343	5564	5961	15192	16172	2537	2929	13305	13553	1075	1101	741	1020	15314
s173	10692	9117	10225	8453	2490	3709	9143	9771	13517	14867	3413	3512	3912	2650	3126	3278	4761	4127	4977	4641	5834	6066	9805	9679	11704	14841	7101	6567	8354	7928	7110	11175	6816	6439	11509	12460	5059	5736	14485	13375	2414	2633	11164	12381	1004	1212	790	1052	14706
s174	11275	8387	9297	9497	2247	4197	8629	8888	12657	13026	3713	3488	3364	2678	3642	3012	3900	3908	4127	3904	4557	5025	10369	10110	12089	13354	8907	5505	7710	9119	7028	11305	6299	6278	14314	12366	6081	5796	14097	14005	2894	2925	10652	12570	1133	1195	882	1215	14511
s175	10289	7954	10530	11569	2284	3419	11719	12104	20054	20072	6747	4628	7144	4716	8042	7129	5541	4058	5164	2819	8659	6300	12606	11706	17702	22382	9510	6252	6246	5747	7545	12638	8730	8106	8325	7823	4684	5087	12557	15147	1699	2519	14320	17813	1122	1521	1763	2042	24809
s176	11892	9990	9885	9077	2108	3897	9702	8380	12207	11819	4165	3107	3794	3122	3812	3165	4469	4199	4319	4170	6055	6167	10992	10722	13450	16823	8196	6254	8822	9135	7416	11355	6668	6471	13847	12762	6242	6396	14505	15152	2663	2502	11524	13489	1446	1500	805	1019	14230
s177	11091	9846	10622	10264	2732	3846	9732	8282	12578	13034	4279	3338	3887	2918	3572	3049	5078	4791	4298	4752	5689	6075	13748	11888	13296	16872	8798	8305	9621	8864	8599	13290	7560	7073	14228	14007	6325	7287	18501	17717	3186	3360	15874	16028	1229	1305	925	1307	17687
s178	12597	10551	10941	10838	2824	4905	11303	10319	16851	17697	4354	3488	4658	3535	3683	3413	5577	5316	5453	5166	6355	7088	12135	10949	12816	15814	9349	8907	11239	10958	8260	13371	8444	6840	15261	14127	5689	5747	17577	17489	3000	3025	12833	13829	1215	1549	844	1155	15477
s179	11097	8792	10607	9816	2550	3970	9494	8294	12520	13030	2963	2884	3550	2905	2807	2470	4654	4607	5335	4894	5905	6030	9878	10315	10169	13230	8603	6550	9383	9044	8569	11676	6370	5639	12143	12045	5430	5354	16581	16941	2661	2982	11768	13262	998	1664	788	1144	15051
s180	10727	8650	10605	9317	2942	5869	8095	7339	12970	15285	3756	3372	3749	3180	3119	2612	4394	4973	5492	4859	6559	5952	12589	12079	13838	13680	8162	6906	9529	10345	9014	13384	6917	7212	11224	12728	5880	6642	16892	18749	2577	3299	16274	14985	1307	1789	912	1508	17294
s181	7675	8629	10677	9741	3475	4780	6347	6906	16720	15777	1716	2819	3912	3182	4737	3704	4065	3696	4022	4039	4962	5237	8654	9844	7326	18992	9647	2342	11087	6209	5959	6711	4118	2715	5423	7675	6299	5466	7315	6527	2504	2361	7178	8697	1005	820	769	1030	12239
s182	9634	7180	9974	9497	2048	4598	8640	8324	11742	12137	3347	2843	3870	2609	2580	2590	4478	4422	4926	4997	5217	6323	9557	10440	11706	12572	7232	5725	8192	8335	7695	11333	7172	5119	11706	11359	4896	4776	17397	16075	2299	2669	11837	12199	979	1022	869	1095	14550
s183	9775	8389	8618	8074	2352	3544	8014	7238	11519	12437	3739	2924	3441	2714	3225	2732	4551	4523	5185	4427	6186	5689	11427	10684	11417	14057	8719	6355	10084	10694	7628	12321	8219	6840	11132	10264	5352	5397	15280	14134	2331	2378	12239	12267	1499	1467	749	1073	12210
s184	9769	9032	8970	7491	2309	3527	7739	7007	10424	10716	3432	2599	3756	2734	2747	2232	3754	4037	3891	3809	4847	4596	9767	9750	11438	13992	6979	5391	8558	7950	6087	9572	6239	5355	11286	11633	5209	5841	15297	15353	3089	3186	13272	13720	1077	1095	657	1028	12985
s185	9833	7026	9254	8408	2052	3225	6244	8084	10557	11417	2642	2134	3066	2520	3214	2438	4624	3964	4394	4234	4514	4890	9488	7750	10142	10770	6533	5419	7739	7080	6390	9531	6038	4962	10377	8877	5646	5365	13692	14217	2669	3029	12195	13114	1118	1373	799	1135	14376
s186	10523	8492	11942	10399	2404	3951	10630	10300	15081	17318	4011	3389	4388	3120	3282	3434	5545	4817	4697	4319	5914	6006	12574	12203	12985	16107	9113	6019	9162	9254	8265	13476	7450	6940	13973	14288	5579	5982	18117	17397	2835	3329	13350	13952	1152	1219	857	1131	17001
s187	8271	7277	8155	7759	2271	3284	6655	6762	10176	10889	2843	2648	2708	2609	2800	2612	3989	4144	4170	3559	4109	4052	9561	9152	10547	12302	7122	5130	5421	6383	5421	9544	5406	5374	9664	9199	5164	4967	12816	12381	2025	2127	10101	11361	1165	1097	655	960	12685
s188	8520	7245	8202	7298	1694	2927	7566	7289	10298	10499	3205	2479	2457	1956	2312	2093	3758	3814	3698	3317	4227	4193	9600	8552	10853	12773	6645	6141	7872	7300	6332	10097	5931	5867	11198	10234	4289	4924	12627	12214	1990	2082	10307	10860	996	1223	752	970	12987
s189	10924	8192	10292	10095	2704	4005	9227	9104	14800	14841	4005	3120	3464	2768	3045	2515	4067	4251	4052	4073	5070	4855	11284	10140	11864	15180	8961	6795	10358	7450	7757	12030	6998	7594	12760	10392	5427	5946	15049	14922	2526	2837	12332	12670	1073	1199	818	1187	14288
s190	9863	7626	8965	8850	2136	3942	8421	8376	12315	12700	3465	3027	3115	2909	3135	2805	4780	4928	4628	4345	5250	6014	9930	9872	11093	13919	9317	6184	8759	8897	6840	10772	6726	5982	13455	11134	5997	6867	14132	13690	2766	3419	11922	13050	1005	1097	797	1238	15188
s191	11609	8539	10223	8689	2213	3370	6147	6224	10845	11432	2820	2787	3910	2955	2800	2961	4722	4163	4515	4099	5329	5916	10229	8607	9889	12602	7795	5950	7800	6975	5697	9096	4857	5309	12310	10577	5333	5642	11505	13332	2633	3034	11579	11909	812	1161	659	1000	13484
s192	9869	8324	9413	8140	2483	3282	8080	8232	12070	12919	4334	3216	4422	3272	3602	3297	4199	4144	4335	4037	5912	5280	11104	11256	11129	13607	8412	6394	8189	7990	6428	11629	5860	5837	13622	9812	5014	4894	13874	12615	2804	2277	9615	10671	985	1030	837	977	14849
s193	9977	6276	10405	8952	2522	4137	8436	8800	12615	13307	3387	2888	3640	3479	3029	2871	5609	4487	5065	4902	5655	5564	10679	9100	11294	14025	10236	5642	9522	8762	8340	12919	7296	5873	12210	11097	6029	5999	15308	14920	2929	2286	13795	13887	1122	1197	829	1049	15614
s194	10326	6692	11406	8502	2828	3537	10395	9113	17504	15057	6297	3640	7735	6330	5742	4920	7667	5348	4673	2472	9199	7148	13767	17224	18962	23616	9081	6199	11775	9801	8537	14125	11035	10650	16052	12045	3465	3696	14093	20879	1236	2290	11054	17850	752	739	396	1465	39625
s195	9666	7386	10971	9829	2849	4367	7684	8337	15049	15385	4090	2824	4330	3209	3870	3135	4499	4641	4832	4654	6197	6443	10339	8924	11215	13731	8744	6760	9047	8663	7823	10845	6996	6525	12915	13064	5151	5729	15527	14378	2543	2858	11331	11865	990	1073	707	977	13994
s196	9182	8365	10770	11050	2646	4412	8706	7665	12497	14322	3152	2550	3300	2269	3160	2757	4534	4341	4422	4182	5455	5258	12370	11969	12306	13952	8854	7386	10047	10673	8046	11582	7862	7529	11648	12449	5515	5809	14670	14670	2736	2699	11826	13774	1052	1290	739	1114	13907
s197	9137	8312	9027	7394	2241	3548	7352	7379	11734	13178	3944	2609	3291	2376	3119	3015	4864	4817	4776	3908	4907	4641	10315	10193	10184	13047	7225	5505	7632	7868	6578	11389	6390	5663	10500	9839	5680	5498	13427	13103	3435	3070	10665	11749	1064	1294	807	1026	12840
s198	12169	9501	11232	10330	2545	3749	11070	9638	14794	15741	4080	4504	3962	2961	3512	3212	5245	4937	4555	4587	6145	6434	11740	12070	15059	16547	9261	7497	9675	9430	9135	14376	8162	6659	14050	12497	5474	6252	17629	16032	1947	2144	13442	14406	1302	1279	771	966	15030
s199	11134	7967	11003	9441	2288	4079	10000	9300	14084	14584	3874	3621	3983	3827	3480	3385	4872	4324	4390	4474	5843	6132	11509	11277	13257	16319	8723	6666	9962	10139	7853	13804	6897	6554	14202	11489	5807	5689	16564	15434	2387	2519	10926	12899	1150	1341	777	1082	15102
s200	10662	8509	10883	8252	2969	4137	8449	7941	12750	14012	3615	4005	4709	3818	4142	3507	5192	5144	5123	4553	5318	5451	11288	10328	11708	15546	8239	6349	9623	9351	8277	13116	8125	5854	13163	11676	5282	6137	19024	17189	2616	3263	12030	13804	1182	1215	837	1345	15265
s201	9422	8434	9025	8245	1909	3432	6672	6795	9831	9404	2560	2798	2775	2545	2327	2224	3711	4080	5601	5211	5091	5140	9465	8091	10864	12998	6392	5436	7184	7572	5607	11025	6576	6495	11174	9441	5775	5444	13729	12625	3210	2856	12840	13810	1043	1155	1030	1204	15029
s202	10752	7448	9244	7617	2712	3554	8209	7206	10960	12117	3477	2882	3750	3036	2592	2751	4229	4343	4752	4472	4429	4958	9368	8569	12201	16259	8507	5295	8849	6154	6539	11594	5832	5751	12554	11385	5054	4785	15008	13174	2524	2374	11663	12516	1020	1013	745	855	12936
s203	10347	8117	9985	8805	2871	3940	10800	10009	13189	13581	3681	2901	4581	2877	2755	2976	4703	4740	5132	4684	4881	5235	10735	10109	12612	16013	9593	7165	10499	9229	8695	14410	9113	8594	13890	12040	6126	6231	20987	18867	2710	2939	13770	15891	1110	1358	1007	1272	18390
s204	9790	8162	10799	10022	2650	3792	8217	8492	15529	14472	3932	3503	4457	3377	3692	2976	5459	5299	5070	4358	5916	5665	11415	11414	12434	13675	6563	6347	11335	10575	8138	12820	6816	6994	12745	11976	5057	4152	16634	16064	2384	2106	13092	14057	921	1247	794	1080	16679
s205	9985	8250	10917	9317	3165	5151	8498	8172	16384	16947	3664	3049	4787	3829	4654	4097	4566	4356	4690	4575	6615	7004	13737	15239	17230	21456	9329	5682	12327	10877	8702	14187	7941	6379	11250	11025	9374	4735	16647	11470	4673	4409	14284	12375	1517	1356	1313	1244	17354
s206	10009	8202	10345	9345	2485	3831	8963	9850	13129	13658	3870	2843	3059	2265	3105	2674	4444	4515	4382	4367	6192	5864	12089	10064	11024	13975	8059	8234	9700	8954	8991	13508	6186	6284	12657	11779	5145	5059	16551	14565	2369	2288	11391	12182	1049	1137	696	932	14423
s207	9906	8031	9274	8412	2817	4064	9715	8847	11976	12777	3702	3184	3724	3210	2922	3060	4695	4482	5616	4643	5159	5520	10622	10339	11095	13926	8140	6117	8425	8322	7077	12132	5850	5387	13530	11699	5869	5672	15495	14494	2736	2700	13020	13238	951	1236	782	1071	15229
s208	10590	9102	9180	8044	2579	3940	9734	8498	11490	13525	4294	3479	3767	3032	3512	3019	4729	4898	4367	4240	5273	4890	11277	9874	12992	15940	8507	5337	8164	8569	7842	12090	7275	6295	12484	11288	6405	6469	16182	15679	2798	2620	10894	12002	897	1114	872	1133	15749
s209	9602	6207	10647	9390	3634	5674	11492	5655	14537	19759	4215	2496	4118	4915	4064	4769	5984	6539	6259	6842	5280	6989	11273	13270	17635	15134	9505	10759	10242	12743	8736	22656	12012	12126	15167	16219	6349	6799	16069	20279	2903	3000	19341	19667	1765	1463	1675	2022	25887
s210	10311	8809	10150	9394	2560	4017	6737	6632	10832	11774	2910	2618	3587	2646	3008	2472	4140	3880	3597	4069	5228	5361	9786	10611	10710	12593	9212	6415	9229	8652	7632	9780	6347	5910	11391	11916	4937	5781	14479	14714	2432	2436	10579	11880	1071	1225	749	1094	14039
s211	11875	11804	9173	9036	2457	3647	9010	7911	16467	18522	4000	4062	6263	3794	3625	3925	5112	5084	4047	5601	6527	7812	11250	10529	17828	20819	8535	5320	8738	8273	8850	12970	9469	8200	14097	13116	4515	4763	7859	9047	2264	2130	6017	12079	655	690	842	1435	11594
s212	11875	11804	9173	9036	2457	3647	9010	7911	16467	18522	4000	4062	6263	3794	3625	3925	5112	5084	4047	5601	6527	7812	11250	10529	17828	20819	8535	5320	8738	8273	8850	12970	9469	8200	14097	13116	4515	4763	7859	9047	2264	2130	6017	12079	655	690	842	1435	11594
s213	8697	6374	8727	7793	2310	4230	7795	7030	12880	12870	3565	3081	3649	3098	3711	3130	4240	4094	4617	4560	6002	6032	9257	9910	10409	11877	7028	5614	8252	7551	6582	9700	5545	4761	11646	11198	5384	5226	16705	15263	2830	2747	12390	12990	964	1287	752	1060	13459
s214	9640	6302	9863	9224	2539	3949	7740	8054	11835	12447	3126	3128	3387	2661	3409	3081	4047	4499	4326	4467	5481	5297	11714	13167	11687	14001	9044	6657	10000	8794	7446	11522	7221	6450	12353	10662	4465	5470	15927	14485	2624	2642	12330	12936	1152	1371	786	1223	13707
s215	9272	7480	9947	9689	1930	3492	8419	7849	12499	12546	2835	2779	3891	2954	2924	3167	5247	5254	4148	3758	5202	5001	10152	10077	10416	12302	9372	6291	9372	7688	6550	9647	6704	4849	10802	8427	5192	4547	14307	11014	2400	2333	10575	9730	1071	940	893	953	14417
s216	11699	9075	11260	10358	2657	4112	9630	10302	14048	15636	4238	3439	4071	3529	3610	3276	5063	5044	5625	5556	7050	7544	12034	12839	14507	15771	9902	8093	9859	10844	8931	11867	8095	8387	13298	13109	6244	7356	19170	17404	3584	3501	14670	14882	1122	1536	756	1260	16114
s217	10257	8468	9636	8290	2599	3689	7874	7484	13309	13335	3164	2691	4032	3072	3203	2987	4737	4480	4515	4094	5089	5404	9880	9274	12340	14832	9184	6709	8963	7958	7545	12561	6668	5965	12330	10909	6477	5845	16067	15062	3634	3085	13448	14209	1064	1137	720	1019	14952
s218	9415	8250	10167	9807	2676	4105	6870	6402	12840	13510	3694	3081	3756	2997	3139	2841	4504	4500	4849	4922	6149	5804	11372	11029	11903	13028	9045	6222	9287	8659	7332	11504	7079	6882	11132	11217	5640	5594	15917	14719	2725	2481	13433	14340	979	1335	745	1060	14380
s219	11404	7810	10840	9535	2650	3837	9964	9250	13208	13448	3977	3340	4019	3107	3919	3132	5132	4898	4487	5005	5667	5745	12107	9979	12865	16238	8974	5884	8445	9882	8084	11805	7133	7656	14772	12291	5959	6945	14309	16133	2764	3284	14399	15263	1114	1472	906	1409	14768
s220	11404	7810	10840	9535	2650	3837	9964	9250	13208	13448	3977	3340	4019	3107	3919	3132	5132	4898	4487	5005	5667	5745	12107	9979	12865	16238	8974	5884	8445	9882	8084	11805	7133	7656	14772	12291	5959	6945	14309	16133	2764	3284	14399	15263	1114	1472	906	1409	14768
s221	12747	10478	14522	13384	3507	5564	11260	11299	18522	18938	4742	4054	5153	4472	3854	4039	5552	6055	5117	4926	7500	7080	14457	14389	15364	20432	10827	8121	14504	10830	9985	15284	7720	7510	16514	15426	6705	7024	19641	20511	3435	3119	12846	14290	1080	1367	842	1199	16913
s222	11640	8498	9130	8095	2219	3645	7619	7112	10684	11016	3726	2719	3182	2753	3319	2594	4350	4324	4842	4322	5389	5033	9784	9739	12385	14224	7495	5916	8451	7964	7144	11524	6734	5676	13283	10617	5400	5749	15799	15464	2530	2468	13184	13455	983	1157	936	1270	15330
s223	12570	10180	11382	9972	2505	4022	10604	9563	15612	15672	4729	3480	4649	3989	4750	3259	5444	5224	4999	5155	6507	6284	11256	12505	14198	19298	10309	7482	12554	9336	8550	12644	8684	8931	16097	15914	6762	6443	17633	16555	2965	2494	14798	14196	1178	1154	887	1238	15443
s224	10767	7694	10433	9949	2597	4379	9357	8140	15090	15634	4187	3396	5234	3342	4034	3559	5558	5640	4285	4877	5204	5704	12674	10671	13073	16208	9220	6833	9143	9402	6559	12732	7575	7058	15242	13080	5847	6629	17564	17708	2513	2819	13037	14084	1289	1332	919	1005	14067
s225	9694	8494	10902	9944	2882	4084	7851	8271	13071	13045	3983	3700	3717	3259	3915	3465	4724	4812	4129	4266	5580	5451	10266	12060	11091	13277	8920	6124	9032	9089	6803	12179	6231	5234	14151	12779	5950	5759	16692	16345	2766	2944	12615	14828	1137	1264	835	1026	14757
s226	8813	6870	8995	7952	2237	3569	7487	6977	11277	12509	3445	2663	3345	2982	2610	2055	3750	3861	3919	3732	4307	4898	10343	10313	10251	14372	8010	5500	7879	6535	7487	10555	6119	4622	10305	10180	5260	4984	15345	14985	2528	2669	11316	12252	1015	1260	739	983	13371
s227	8813	6870	8995	7952	2237	3569	7487	6977	11277	12509	3445	2663	3345	2982	2610	2055	3750	3861	3919	3732	4307	4898	10343	10313	10251	14372	8010	5500	7879	6535	7487	10555	6119	4622	10305	10180	5260	4984	15345	14985	2528	2669	11316	12252	1015	1260	739	983	13371
s228	10965	8920	11423	9105	2301	3788	9655	9021	13058	13982	4245	3100	4094	3025	3364	2730	5408	5567	4868	4699	5901	6079	12184	10930	13454	17790	9413	7690	8318	9351	8545	13049	7094	7007	12004	12090	6184	5950	17888	15254	3152	2659	12769	12574	1279	1343	812	983	15068
s229	11747	9499	11072	10324	2815	4380	9936	8519	13133	13988	3885	2768	4037	3120	3154	2307	5046	4917	5235	5222	5440	6195	12115	11384	15368	17532	9055	6437	8414	8565	6805	12124	7139	7877	13189	12694	8140	6685	16688	17519	4017	3057	14378	14160	1459	1448	1002	1298	15891
s230	11747	9499	11072	10324	2815	4380	9936	8519	13133	13988	3885	2768	4037	3120	3154	2307	5046	4917	5235	5222	5440	6195	12115	11384	15368	17532	9055	6437	8414	8565	6805	12124	7139	7877	13189	12694	8140	6685	16688	17519	4017	3057	14378	14160	1459	1448	1002	1298	15891
s231	8901	7814	9473	9782	1913	3822	7885	7694	11532	11305	3760	3619	3006	2295	3375	2609	4289	4367	4358	4092	5547	5562	10332	10795	12593	14877	8354	5524	8477	8391	5987	9539	6285	6220	12990	12347	5637	6432	14738	15788	3055	3246	11558	12353	1144	1174	835	1084	13637
s232	9567	8400	8408	7789	2363	3435	8340	8217	11305	11475	3824	3267	3274	2742	3334	2603	4542	4534	4071	4302	4765	5243	7857	9141	12689	15387	8286	6008	6887	7433	7335	11211	6162	5685	11682	10995	5344	5489	14862	13364	2202	2400	13030	14487	1137	1259	737	1086	15344
s233	9910	7967	9782	8280	2318	3754	8505	7634	11845	13032	3068	2959	3495	2674	2852	2779	4544	4763	4304	4439	5474	5781	10259	10800	12132	14222	7694	5618	7898	8346	7259	11159	6053	5772	10071	9799	5136	6092	14022	13251	2657	2753	10787	12490	917	1019	782	1015	13195
s234	9570	7517	10774	9897	2745	4088	9171	8616	12981	13755	3679	3569	3974	3100	3239	3621	4581	4364	4804	4585	5903	5794	11901	11275	13484	14702	8582	7176	9730	9904	8007	11095	7103	6167	13212	13834	4740	6666	17114	15972	2106	3374	13506	14288	1335	1390	852	1217	16645
s235	9570	7517	10774	9897	2745	4088	9171	8616	12981	13755	3679	3569	3974	3100	3239	3621	4581	4364	4804	4585	5903	5794	11901	11275	13484	14702	8582	7176	9730	9904	8007	11095	7103	6167	13212	13834	4740	6666	17114	15972	2106	3374	13506	14288	1335	1390	852	1217	16645
s236	12747	10174	11316	10429	2552	4958	10313	9938	13660	14085	3889	3370	4184	3299	3599	3250	5333	5438	5378	5363	6645	6645	12342	12734	12619	15207	8254	6297	10949	10365	9484	12938	7714	7577	14440	12962	5393	6027	17794	14952	3104	3287	13007	12698	1110	1326	735	987	15529
s237	9458	8807	10395	9372	2603	4172	8093	7452	13274	12818	3659	2909	3210	2946	3522	2680	4924	4851	4776	4887	5067	5659	12246	10199	12179	14046	8256	6374	9591	9696	7950	11862	6792	6263	11607	11080	4780	5224	15702	15655	2127	2468	11832	12711	953	1380	662	915	14599
s238	8944	6959	9285	9224	2440	3548	7590	8494	13155	12462	3471	2588	3049	2031	3111	2378	3977	4155	4356	4140	5558	4956	11556	10695	11924	14014	7956	6068	6679	8659	7159	12299	6419	6109	12520	11181	4574	5834	15674	14301	2530	2760	10679	10902	989	1221	602	807	13491
s239	11942	9315	10296	9449	2110	3816	9989	8991	14346	14147	3807	2642	4088	3263	2963	3310	5489	5277	5046	4885	6197	6145	11166	11483	15447	15306	9929	8498	10125	10180	9299	14515	8912	9122	17215	16195	6505	6687	19379	19139	2123	2136	13482	15087	1067	1236	930	1232	19101
s240	17905	7958	11138	9509	2423	4294	8935	8946	13221	14042	4212	3325	3359	2783	3338	2738	4232	4347	4238	4780	5577	6390	9075	9938	11245	15977	10506	6454	11637	8781	7932	12782	7039	7532	12370	12212	6518	7189	16000	15426	3083	3293	12602	14459	1086	1289	696	1110	14078
s241	11618	9707	10049	9589	2459	3803	9132	7714	11040	12308	3525	3004	4064	3351	3599	2942	4836	4557	4480	4161	5365	5725	10759	10420	11355	14027	8929	6199	8753	9863	7924	11907	5927	5655	14196	12464	6284	6822	15921	15595	3269	2909	13163	14991	1028	1272	818	1155	14627
s242	8117	6790	9839	8564	2076	3548	5648	5620	9542	10240	2370	1832	3224	2950	2605	2166	4444	3668	4427	3942	4510	4810	8685	8860	9057	10688	5744	4217	7637	8237	5397	9117	5106	4686	10290	10140	4874	5445	15036	14751	2402	2505	14061	14024	1285	1414	1047	1215	15250
s243	8650	7379	7787	7005	2224	2789	6495	6447	10296	11406	2914	2427	3006	2749	2847	2849	3809	4000	4362	4255	4495	4757	8609	8547	9734	13251	8025	5235	8346	7347	6120	9143	6713	5852	12282	9522	5149	5942	12135	11972	2363	2734	11886	13094	1214	1602	889	1292	13058
s244	9839	8999	9107	12539	2372	4915	9977	10110	16508	22125	8093	4975	6119	5772	4559	4341	5997	7431	5400	4868	9154	10139	13557	16420	19917	22639	5361	4731	11985	11393	5924	11179	10739	7971	7394	7857	5888	7255	7071	19279	1924	2367	10515	13797	1120	1739	1015	1305	15032
s245	9720	7217	8817	8022	2196	3653	7851	6790	11682	11012	2736	1645	3630	3083	3085	2252	4577	4540	5091	5192	4838	5841	10401	8470	10251	13095	10005	6516	7274	7707	7626	10875	7639	6370	12561	12497	7808	5631	17095	15169	3150	2781	14235	13731	1054	1229	1028	1480	16969
s246	11069	9282	10772	8369	2779	3488	10425	9799	12364	12773	3765	2909	3773	2910	3389	2567	4950	5022	5014	4665	6214	5852	10607	10969	13217	15537	8912	6762	10523	10159	7810	11856	7934	8179	14012	11978	5494	6709	18630	17380	3372	3591	15150	15983	1176	1170	1026	1427	16439
s247	10611	7962	10343	10073	2685	3698	9790	9248	16360	17046	3752	3135	3752	3490	3240	3169	4300	3820	3807	3644	6171	6627	14888	9912	12822	15330	9087	5102	13035	8410	9329	14348	8119	7855	11987	11425	3233	4365	13962	14569	1277	1512	9784	12291	717	1206	563	1037	13182
s248	8537	7287	8742	8419	2155	3162	7319	6966	9664	10422	2798	2699	3167	2412	3132	3057	3914	3719	4589	4013	5382	5805	9120	7954	10165	11475	7559	5513	6152	7124	6636	9027	4527	4125	9310	10275	4997	5055	11924	11440	2235	2549	9559	9409	848	1067	765	1107	12887
s249	9225	7330	9368	7562	1969	3509	8078	8415	10930	10915	3664	2678	3032	2359	2729	2959	4101	4296	4229	3629	4806	4652	10019	9689	10907	12775	6938	4904	8384	8333	5736	9593	5145	5054	11635	11766	4045	4737	12885	11309	2033	2367	9962	10073	927	1084	739	797	13069
s250	12210	10500	8865	10624	1609	4135	6805	9872	7714	14207	1107	2991	737	3334	591	2772	2265	4800	3314	4484	4830	5342	10800	12124	13238	16622	10309	8027	8689	9576	8402	11625	7662	6947	14342	11700	6310	5817	17286	16459	2039	2547	12514	15306	848	1317	679	1281	14042
s251	9484	7399	8629	7965	2524	3717	7917	7545	10536	12154	3675	2318	3222	2455	2946	2685	3912	4292	3944	3983	4827	4975	9777	10049	11744	13142	7519	5952	8414	8185	6764	11213	7064	6325	12246	11337	5847	6057	12795	14048	2522	2399	11327	12910	951	1210	724	1007	14455
s252	10995	9698	8712	7907	2054	3254	8920	7358	10242	10973	3113	2676	3207	2455	2121	2695	3666	3889	3584	3512	5320	5010	10094	9923	12145	14745	7840	6822	8003	9327	7455	10832	5950	6240	12510	10825	5595	5650	13480	13997	3139	2925	10922	12934	1375	1304	687	891	13043
s253	11481	9420	9726	10120	2475	4337	8622	7328	11742	12974	3735	3130	4045	3561	3822	2976	4870	4750	5254	4499	5037	5830	11213	11432	12428	16853	9165	7703	9702	7932	9282	14882	7808	7277	12614	11650	6897	6962	19834	16973	3824	3512	15398	16904	1289	1536	1015	1517	18240
s254	8359	7150	9274	9792	2539	3992	8219	7358	12355	12111	3842	2843	3473	2672	3199	2479	4049	4127	4114	3822	5344	5117	9576	10459	14337	16544	6974	5220	7144	6674	7240	10249	6150	6152	10941	10890	4939	5052	14670	14991	2076	2762	11515	11819	1122	1148	612	959	14895
s255	8393	5903	7920	5620	1735	3083	4619	5162	9554	8699	2740	3192	3621	2652	3019	2714	4005	3655	3983	4167	4283	4442	7637	6887	9897	11033	5114	5429	6059	6053	6060	8985	4489	4605	9012	8558	4444	4345	11708	11100	2627	2530	10763	11436	951	1154	769	1319	11873
s256	8834	8288	9692	9259	1855	4169	7553	6454	11159	12042	3640	2594	3432	2796	3147	2479	4729	4943	4900	4292	5895	5873	11464	11322	11541	13637	9315	8162	9874	10037	8987	13195	7238	6914	14264	12983	5719	6079	17873	17387	2819	3940	14672	15992	1144	1407	1004	1332	17442
s257	9053	6096	8804	8115	2329	2370	6876	6700	10080	13032	2747	2543	2890	1907	1911	2025	3775	3385	3927	3582	4071	3685	9887	8335	9747	11170	8159	5856	7971	7202	6179	9724	5796	5736	9927	8864	4519	5239	15662	13755	2670	2254	11740	11871	989	1257	945	1129	13236
s258	9676	6403	10373	10297	1722	4349	8864	12303	19653	18369	5336	4018	4587	4201	2572	6666	8596	7151	7083	6016	6879	10020	10590	17047	15355	25192	5399	2891	12397	9353	5518	7219	9956	3554	10331	9531	6003	3601	8235	11810	2917	953	11772	13306	1318	774	1510	2092	12690
s259	8616	6533	9529	9293	2400	3957	7900	8470	11198	11980	3098	3377	3604	2742	3169	3471	4137	3805	4028	3730	5097	5190	10026	10652	10934	12522	8897	5676	9184	10422	7508	10789	5582	5089	12405	10920	2800	4632	16223	14427	889	2655	10847	12199	867	1067	629	1015	14275
s260	9510	13112	10279	11069	2309	3426	8802	11892	13973	12685	3582	4695	3944	5007	3340	3132	5314	6887	4699	4830	5753	6979	10118	10202	10665	19272	7628	6240	9807	9625	6801	10409	7065	7114	14027	12285	6224	5927	14269	14890	2603	2123	13339	12599	1388	1382	955	1124	17065
s261	20252	11457	10705	6747	1501	2823	13519	18667	24848	21281	5280	3482	5637	5846	6845	4685	8847	2581	6849	4086	4834	2589	10471	15887	15355	30714	4405	2793	7249	15436	6496	19258	13400	8401	12728	10314	7240	2589	20048	23326	4600	375	23347	21532	2288	1539	230	642	25494
s262	20252	11457	10705	6747	1501	2823	13519	18667	24848	21281	5280	3482	5637	5846	6845	4685	8847	2581	6849	4086	4834	2589	10471	15887	15355	30714	4405	2793	7249	15436	6496	19258	13400	8401	12728	10314	7240	2589	20048	23326	4600	375	23347	21532	2288	1539	230	642	25494
s263	9203	9330	9220	8095	2438	3503	8400	7630	11835	13079	3704	2965	3349	2412	2719	2560	4245	4810	4821	4534	5595	6008	9998	10898	10643	13585	7896	6677	8661	8275	6512	9782	6794	6683	11354	9293	5130	5573	13673	15248	3134	3235	11717	12741	968	1446	745	1144	13881
s264	11280	8400	9293	9162	2052	3812	9653	8592	13356	14224	3880	3224	3634	2717	3668	3105	4401	4251	4022	4127	4382	4634	10472	10892	12062	14580	8997	6949	9540	10125	7710	12177	7255	6689	13784	10830	4515	5142	15475	13512	2205	2382	10309	11727	987	1384	638	1015	14549
s265	11715	8310	8747	8852	2089	4199	8954	8633	11243	12179	3563	2740	3332	2745	3375	2629	4560	4499	4109	4169	4375	4705	11217	11522	12302	14736	7722	5858	9623	9216	7919	11766	7178	7587	13560	10654	6263	5918	14492	14492	2372	2592	11393	12822	1099	1305	831	1152	15122
s266	9792	8204	8740	8380	2112	3867	9437	8907	12360	12994	3353	2787	3585	2877	3488	2766	4600	4656	4874	4716	5714	6120	10995	11211	11031	12998	8035	6171	8333	9574	7484	10872	6454	5819	12645	11995	5095	5444	16229	15698	2367	2665	10997	12634	966	1131	765	970	14213
s267	9203	9330	9220	8095	2438	3503	8400	7630	11835	13079	3704	2965	3349	2412	2719	2560	4245	4810	4821	4534	5595	6008	9998	10898	10643	13585	7896	6677	8661	8275	6512	9782	6794	6683	11354	9293	5130	5573	13673	15248	3134	3235	11717	12741	968	1446	745	1144	13881
s268	11672	9027	11490	10013	3434	4255	9818	9494	14865	14438	4388	3460	4277	3019	3666	2862	4952	5378	4787	4455	6310	6417	9929	9945	12409	17738	7257	6064	8571	8663	6709	10665	5931	6237	12402	10538	5624	5074	16409	14082	3237	2665	13212	12915	951	895	606	780	13553
s269	10883	8528	10028	8222	1714	2792	10015	9042	14262	15634	4122	4030	3664	2856	4489	3730	4538	4277	4898	4365	5819	5954	9441	9516	11076	16281	7725	5217	9285	8400	7000	11920	7313	6405	14121	12100	6160	5196	17406	16150	3248	2969	15713	15265	1343	1352	775	1075	14880
s270	11950	8310	9505	8543	1947	3717	8895	8879	12844	13686	2800	2858	3105	2138	2192	2580	4564	4596	4529	4544	4780	5059	11702	11695	12113	15010	8429	7069	7994	7373	8213	12484	7424	6173	11912	11789	5061	5299	16512	15814	2374	2344	11601	12300	942	1309	713	1219	14725
s271	10815	10654	10064	10124	2230	4052	10105	7101	12992	13722	3233	2787	3942	3270	2995	2640	4575	4667	4452	4587	5687	6162	10103	10088	13493	15996	7632	6152	8189	8429	6794	11087	7808	6240	12795	11445	5517	5305	17044	15259	2725	3021	12612	12705	1026	1159	822	1206	14299
s272	8089	4911	7709	4009	1956	1769	7200	4613	11007	4510	2740	2340	3647	62	2654	199	4701	1380	5091	1769	4077	2286	9062	7761	9411	10112	6908	4199	6773	7724	5826	9287	6458	5340	10056	10114	4967	4645	14174	14535	2860	3064	12119	13075	1103	1064	863	1367	13915
s273	9182	7150	10395	9315	2237	3544	7352	7979	12450	13212	3810	3006	3660	2502	2730	2907	4720	4785	4628	4335	4917	5430	11337	9516	9970	12432	8318	4624	9876	8736	6186	11196	7296	5577	12569	11513	5700	5815	13208	14558	2787	2301	13300	13746	1182	1185	872	1030	14762
s274	7887	8005	6347	5610	1937	3015	7315	7420	9561	10442	2354	1765	2890	2408	2571	2279	3861	3638	3914	3713	4424	4553	8520	9985	10259	12194	6353	5526	6685	7322	5669	9600	5980	6027	10071	9188	4260	4973	14022	13470	2232	2288	12492	12452	910	1260	681	1099	14689
s275	11082	9420	9720	8978	2082	3612	7943	7549	10615	11895	3792	3218	4005	2567	3272	3297	4705	4500	4604	4343	5616	5708	11181	10470	12797	14770	7894	6632	8520	8367	7375	11001	5787	5991	12944	11850	5337	6499	14132	14678	2702	2610	10928	11451	1011	1191	681	1118	14612
s276	8691	6915	7669	8132	2646	3925	7544	6902	10860	11519	3104	2744	3617	3439	2987	2779	4810	4463	4197	3775	4544	4945	10840	10521	10502	12443	8215	5612	7240	6855	7210	10622	7219	6025	10056	10709	5682	5279	15764	13095	2273	2267	11558	12645	1131	1420	707	1142	13169
s277	14605	14241	10632	12019	2091	5590	11564	12732	20160	21964	6077	4099	5817	4365	6645	4650	3310	5314	3711	5168	6904	8355	16495	12312	18475	23194	8740	7084	9297	7379	6344	10512	8942	7620	13296	13690	5009	5228	11837	15799	1641	2725	9732	8033	1502	1665	1116	1536	22491
s278	11751	9450	9702	9387	2822	4491	8933	8937	14125	14400	4065	3554	4092	3032	3737	2993	5370	4977	5025	4645	5556	5018	11204	9728	14005	17706	7935	5931	9375	7770	8322	9831	6707	6923	12437	11699	5372	5414	16920	16975	3096	3357	12484	13298	1161	1377	953	1538	15310
s279	11751	9450	9702	9387	2822	4491	8933	8937	14125	14400	4065	3554	4092	3032	3737	2993	5370	4977	5025	4645	5556	5018	11204	9728	14005	17706	7935	5931	9375	7770	8322	9831	6707	6923	12437	11699	5372	5414	16920	16975	3096	3357	12484	13298	1161	1377	953	1538	15310
s280	11376	8357	10352	9036	2277	3621	10611	9925	15450	16643	4086	3209	4497	4165	3522	2629	4952	6109	3953	3662	5905	6651	13289	13784	12936	19020	7637	6694	11108	11811	8738	15017	6546	6651	12604	11299	6745	6854	12670	15321	2723	1504	12188	14565	1945	1416	1170	1334	18195
s281	12182	9186	12677	12119	2967	5254	10206	11057	16570	17644	4257	4202	5603	3750	4206	3584	5721	5449	5157	4937	6912	6730	11117	13011	14489	16911	9674	7532	11573	10883	10559	16943	7489	8260	16371	16377	6158	7377	20969	19514	2991	2884	14655	16703	1283	1690	859	1294	17982
s282	11070	8040	10140	9017	2515	3407	8729	7892	11280	11434	3051	2890	3885	3175	3081	2886	4785	4379	4446	4294	5211	5057	11706	11337	12439	14237	9029	6409	10148	8691	7860	12387	5997	6197	11168	12319	5449	5618	16935	15441	2695	2560	12715	13785	1058	1238	953	1375	15119
s283	11174	8592	12514	10679	2974	4928	8655	8798	14490	14601	3719	3188	4461	3507	3874	3285	5370	5294	5005	5119	5819	6979	14129	11753	12495	16538	10660	7298	10219	11046	9096	14153	8860	7403	15417	15027	6867	7257	20948	19547	3203	3327	15595	16144	1206	1392	1060	1776	17187
s284	10099	7724	9464	9812	2205	4639	8867	8792	12514	14374	4152	2704	3199	2519	2798	2412	3925	4124	4247	4300	5104	5504	10255	12096	10497	16262	8457	6713	9030	8805	8100	10397	6599	5502	12957	12239	5382	5567	16615	15419	2175	2305	12520	12494	1152	1290	713	1009	15900
s285	7671	6479	8414	8282	1885	2890	6732	6992	12220	12374	3055	2699	3767	3242	3134	2631	4092	3942	4499	4302	4986	5115	9188	8796	9880	12070	6940	4804	8719	8665	6244	9672	5393	4377	10939	9846	4868	5168	13485	12996	2421	2629	11357	10746	1080	1309	743	1073	13579
s286	5293	10152	4528	4970	481	2704	10509	14858	10938	16286	6934	3979	2211	3346	4511	5850	2509	5387	3584	3695	3567	5761	7397	8796	10063	21927	5442	1607	4528	6883	5008	9344	11627	3792	10768	13991	6913	4005	15249	10437	2615	1680	13285	7924	1399	1204	774	2075	18590
s287	10425	8817	10024	8798	2250	3994	8845	8856	12021	13799	3627	3315	3743	3036	3424	2933	4654	4553	4392	4382	5575	5549	11194	10369	11228	12859	7472	6623	7952	8839	7287	10718	6953	5989	12915	10675	5213	5408	15692	14262	2376	2877	11815	13065	1232	1506	809	1189	13740
s288	10930	10409	10465	9604	2807	4270	10812	9244	15124	15201	3987	3175	4245	2944	3317	3610	5157	4982	5235	4536	5755	5700	11468	12664	12957	15261	8950	6840	10242	9120	10210	11710	6709	6570	11980	12861	5354	5622	14954	16045	2850	2669	11204	13294	1110	1448	854	1139	15394
s289	11905	10735	10315	10812	2715	4502	10146	8710	12737	14142	4399	3884	4523	3400	3809	3507	4832	4887	5162	5035	5828	6355	14162	13579	15417	17228	7975	6599	10326	8742	8820	12852	9055	8991	13853	14040	5871	5697	17740	17264	2562	2609	12912	13757	1469	1508	715	1080	16932
s290	8205	6854	8479	8234	2234	3649	5910	5213	9737	9741	2965	2434	3104	2526	3068	2292	3908	3820	4097	3996	4532	4470	9364	9462	9580	12042	8520	4682	7362	7731	6434	10109	5811	5020	9694	10079	4109	5196	13110	12385	2168	2620	11537	13035	955	1159	674	1088	13341
s291	13020	10782	12210	11136	2892	5303	11744	9302	15720	17635	4958	3739	3951	3732	3992	3396	5348	4540	5110	5035	7454	7562	13793	13677	14110	17196	10710	7101	11198	11292	9587	14423	8558	7613	13851	14085	5847	7101	22367	21955	2633	3300	16212	15662	1232	1596	784	1125	17078
s292	11483	7860	8550	7484	2247	3070	8226	6955	10493	9915	2637	2640	2972	2652	2828	2759	4547	4199	4409	4035	4750	5174	9625	10107	11982	13514	7806	4937	6647	6137	5295	8775	7277	6570	10772	9994	5091	5372	14622	13772	2850	2661	13452	12505	1152	1298	1017	1360	14082
s293	11674	9520	9972	9822	2357	3531	8940	7939	12195	13060	4169	3580	3366	2584	3330	3874	4939	4615	4840	4144	5324	4962	11655	11822	12876	15758	9767	7170	9947	10422	6850	12518	6801	6985	11127	15085	1795	5939	13729	17895	158	3212	7071	15660	597	1514	36	1480	11485
s294	9089	7532	9955	9462	2243	3985	7587	7581	12096	12780	4189	2410	3460	3042	3400	2714	4431	4534	3689	3681	4774	5264	10472	11177	11444	13570	8935	6353	8817	9201	7043	11254	6327	6107	13485	10345	4607	4832	13637	12914	2138	2282	9891	11320	938	1037	574	792	13707
s295	11093	8888	10395	10675	2772	4324	9389	9938	14969	13935	3972	3720	4279	2460	4086	2586	5654	5033	4688	4502	4859	5273	14076	13705	14095	16827	9105	8312	9557	10300	9987	16032	8262	8612	15327	14483	6861	7622	20335	19255	3360	3229	14832	15700	1135	1343	925	1369	16020
s296	8054	7002	9760	8894	2391	3749	7082	7435	11102	11903	3006	2670	3272	2429	2515	2609	4296	4328	4377	3690	5355	5063	9137	8100	9098	12327	6630	4560	6854	6949	6672	9066	5535	5429	10493	10260	5616	6032	15246	13170	2991	2575	11099	10789	1259	1191	810	966	12372
s297	10677	7975	9799	8222	2340	3265	8565	8301	12741	13589	3462	2995	4392	3471	3495	3306	4992	4875	4737	4512	5601	5871	11037	11288	11254	14963	8520	6779	10630	9730	9484	13270	7604	7163	13500	11942	5888	6122	18360	17162	2712	3252	14824	14721	1163	1365	882	1268	16604
s298	9668	8280	9435	8828	2826	3535	8127	7341	11939	13065	3312	2779	2457	2408	2760	2406	4727	4977	4592	3906	5742	4857	10247	9752	11899	13585	7577	5217	8007	6857	5894	10799	4804	5856	11648	10860	5359	5279	15891	13195	2310	2399	12169	12724	989	1253	805	1129	14149
s299	9810	7499	9848	8070	2414	3848	6145	6824	10992	11948	3469	2252	4114	3747	3555	2847	4772	4857	4592	4592	5232	5142	9482	8565	10720	13870	7431	5414	7482	7105	6572	9443	6145	5382	11918	10804	4270	4133	16127	13795	2423	2547	12906	13849	1114	1384	820	1067	11976
s300	8489	7450	8511	8054	1962	3501	7679	7122	10105	10296	3102	2873	3214	2365	2772	2672	4401	3852	3942	3884	4337	4474	9280	10309	10615	12083	7446	6437	8807	6917	6242	10362	5331	6014	10307	8699	4750	5001	13999	13776	2078	2175	10452	11974	769	904	507	773	12895
s301	9602	7245	10814	8729	2693	3379	6803	5689	13075	12315	3679	2303	3876	3267	3593	3203	4392	3876	4127	3576	5430	4784	10227	9567	10589	12955	8369	5474	8519	8717	6514	10365	6480	5402	11449	11633	4324	5445	15587	14294	2106	2592	11219	12634	989	1191	630	870	13589
[truncated: 232 more columns]
