# Supplementary material for: Machine learning for detecting age and sex effects on corpus callosum volume
Source: PeerJ journal article supplement (doi:10.7717/peerj-cs.3179), 2025-09-22
Supplement: Data3.xlsx [file Data3.xlsx]

## Sheet: Sheet1
GCC_L	GCC_R	BCC_L	BCC_R	SCC_L	SCC_R	GENDER	AGE_GROUP2	AGE_GROUP3
0.00143262	0.0015824	0.00378599	0.00396041	0.00324694	0.00418665	F	A	O
0.00102281	0.00167067	0.00397901	0.00392672	0.00161775	0.000932898	F	A	A
0.00159496	0.00162231	0.00298591	0.00284219	0.00475755	0.00494684	F	A	A
0.00159496	0.00162231	0.00298591	0.00284219	0.00475755	0.00494684	M	A	A
0.0019412	0.00213769	0.00243586	0.00241598	0.00433654	0.00442293	M	Y	Y
0.0018058	0.00218581	0.00367831	0.00362247	0.00486042	0.00501924	M	A	A
0.00231504	0.00233794	0.00282843	0.00270285	0.00475936	0.00536582	M	A	A
0.00244614	0.00257334	0.00354471	0.00370968	0.00449834	0.00463325	F	A	O
0.00154531	0.0021779	0.00222445	0.00275729	0.00401499	0.00473818	F	Y	Y
0.0016136	0.00190626	0.00287224	0.00356138	0.00499799	0.0053391	F	A	O
0.00190584	0.00223158	0.00291835	0.00298809	0.00395293	0.00408534	F	A	A
0.00155359	0.00177968	0.00240692	0.00236296	0.00478401	0.00488135	F	A	A
0.00190584	0.00223158	0.00291835	0.00298809	0.00395293	0.00408534	F	A	A
0.00190584	0.00223158	0.00291835	0.00298809	0.00395293	0.00408534	F	Y	Y
0.00213143	0.002379	0.00290044	0.00316813	0.00531116	0.00550071	F	A	A
0.00215051	0.00243341	0.00300639	0.00302877	0.004317	0.0045903	F	A	O
0.00209011	0.00208688	0.00319574	0.0022476	0.00450811	0.00422222	F	A	A
0.00202248	0.00245215	0.00261491	0.00307062	0.00483559	0.00525079	M	A	A
0.00189849	0.001991	0.00283288	0.00307815	0.00519136	0.00478823	F	A	A
0.00164774	0.00140164	0.00302738	0.00277068	0.00464415	0.00500271	F	A	A
0.00142408	0.00154905	0.00208784	0.00204808	0.00418705	0.00445969	F	A	A
0.00144953	0.00166581	0.00236314	0.00196796	0.00385243	0.00411244	F	A	A
0.00263923	0.00350872	0.0029509	0.00293951	0.00300674	0.00309734	M	A	A
0.00179555	0.00200053	0.0019507	0.00242011	0.00195296	0.00214492	F	A	A
0.00199528	0.0022473	0.00272129	0.00306093	0.00460391	0.005264	M	A	O
0.00181999	0.00202736	0.00344901	0.00340055	0.00486139	0.00521128	M	Y	Y
0.00181999	0.00202736	0.00344901	0.00340055	0.00486139	0.00521128	M	Y	Y
0.00181999	0.00202736	0.00344901	0.00340055	0.00486139	0.00521128	F	A	A
0.00140547	0.00134115	0.0020465	0.00168073	0.00489335	0.00486867	M	A	A
0.00177886	0.00198073	0.00297905	0.00299979	0.00456571	0.00444126	M	A	A
0.00180019	0.00201513	0.00278481	0.00283749	0.00425368	0.00456716	F	A	A
0.00146412	0.00140758	0.00240857	0.00216892	0.00450277	0.00448258	F	A	A
0.0016665	0.00183994	0.00238336	0.00237026	0.0042233	0.00435897	F	Y	Y
0.000222492	0.00131064	0.0040237	0.00150699	0.00406808	0.000786017	F	A	A
0.00146412	0.00140758	0.00240857	0.00216892	0.00450277	0.00448258	M	A	A
0.00134635	0.00159266	0.0037191	0.00173341	0.00657961	6.00902e-05	F	A	A
0.00158301	0.00122672	0.00309837	0.00294503	0.00457044	0.00486268	F	A	O
0.00217189	0.00213967	0.00391474	0.00393831	0.00439799	0.0043422	M	A	O
0.00209735	0.0025219	0.00343372	0.00353371	0.00523617	0.00532938	F	A	O
0.00110518	0.00121472	0.00171538	0.00169103	0.00388597	0.00388029	F	A	A
0.00218381	0.00257157	0.00282893	0.00326268	0.00470871	0.00499216	F	Y	Y
0.00163783	0.00162637	0.00268738	0.00231695	0.00427671	0.00442929	F	A	A
0.0011348	0.00134365	0.00243795	0.00248718	0.00430492	0.00411115	F	Y	Y
0.00167965	0.00169803	0.00286376	0.00302741	0.00492218	0.00529544	F	A	O
0.0014922	0.00166095	0.0028719	0.00283735	0.00489123	0.00527533	F	A	A
0.0015568	0.00143945	0.00262769	0.00248079	0.00451306	0.00431139	F	A	A
0.00167824	0.00206236	0.00225526	0.00233913	0.00434865	0.00461871	M	Y	Y
0.00156689	0.00178138	0.00231195	0.00236087	0.00412945	0.00466153	M	A	A
0.0020694	0.00206872	0.00261784	0.00274152	0.00393287	0.00417073	M	Y	Y
0.00143317	0.00163275	0.00235492	0.00276261	0.00429754	0.00491532	F	A	A
0.00126848	0.00150593	0.0022378	0.00211673	0.00465134	0.00481693	F	Y	Y
0.00159621	0.00180952	0.00316299	0.00339028	0.00417662	0.0045547	M	A	A
0.00159621	0.00180952	0.00316299	0.00339028	0.00417662	0.0045547	M	A	O
0.00174074	0.00201176	0.00351262	0.00346167	0.00549962	0.00576356	M	A	O
0.00203968	0.00220151	0.00290837	0.00305036	0.00504423	0.00528927	M	A	A
0.00222487	0.00249732	0.00377493	0.00399541	0.00484394	0.00525224	M	A	O
0.00125123	0.00168631	0.00218783	0.00247107	0.00424864	0.00450633	M	Y	Y
0.00156495	0.00200124	0.00283508	0.00319234	0.0044522	0.00440319	F	A	A
0.00125261	0.00138428	0.00218922	0.00204263	0.00465144	0.00500519	F	A	A
0.00190762	0.00199389	0.00279325	0.00273492	0.00398695	0.00421452	F	A	A
0.0014904	0.0017003	0.00275159	0.00314743	0.00455591	0.00504565	F	A	O
0.00172438	0.00245039	0.00556637	0.00614087	0.00937771	0.0104663	F	A	A
0.0017549	0.00195796	0.00251988	0.00265117	0.00482356	0.00510715	F	A	A
0.00395615	0.00211591	0.00748483	0.00281905	0.00991209	0.00434469	M	A	A
0.0014463	0.00139929	0.00289345	0.00279088	0.00469449	0.00456969	F	A	A
0.0014463	0.00139929	0.00289345	0.00279088	0.00469449	0.00456969	F	Y	Y
0.00119873	0.00129311	0.00277499	0.0030076	0.0043074	0.00464034	F	A	O
0.000961266	0.00219139	0.00240031	0.00170391	0.000123869	0.000990378	F	Y	Y
0.00161243	0.00157799	0.00396877	0.0034841	0.00418105	0.00418481	F	A	O
0.00231253	0.0022453	0.00325221	0.00292141	0.0042278	0.00471598	M	Y	Y
0.00231253	0.0022453	0.00325221	0.00292141	0.0042278	0.00471598	M	A	A
0.0015852	0.00168413	0.00255892	0.00262046	0.00386369	0.00376165	M	Y	Y
0.0015852	0.00168413	0.00255892	0.00262046	0.00386369	0.00376165	M	Y	Y
0.00268561	0.0030723	0.00404662	0.00453263	0.00499287	0.00507249	M	A	A
0.00197943	0.00213833	0.00244814	0.00244814	0.00397244	0.00419841	F	Y	Y
0.00106065	0.00129997	0.00228986	0.00236301	0.00437141	0.00460835	F	Y	Y
0.0015275	0.00184963	0.00342814	0.00328455	0.0049632	0.00433501	M	A	O
0.00181896	0.0011437	0.000401268	0.00111601	0.000240996	0.000159093	F	Y	Y
0.00167905	0.00188723	0.00311909	0.00284401	0.00448697	0.00488757	M	A	A
0.00170773	0.00158169	0.00285435	0.00260795	0.00507197	0.00531105	F	A	A
0.00198877	0.00210853	0.00360221	0.00374334	0.00482507	0.00500968	M	A	A
0.0019031	0.00189547	0.00276418	0.00260125	0.00470887	0.00489606	F	Y	Y
0.00196616	0.00188695	0.00310262	0.00269986	0.00419009	0.00417398	M	A	A
0.00185103	0.00179924	0.0026009	0.0026632	0.00450147	0.00461932	M	A	A
0.00173346	0.00225384	0.00294053	0.00297911	0.00520723	0.00595394	F	A	O
0.00116605	0.00122501	0.00278318	0.00178313	0.00371911	0.00372254	M	A	A
0.00142739	0.0014772	0.00289993	0.00283844	0.00576483	0.00630575	M	A	A
0.00130661	0.00150278	0.00204202	0.00229954	0.00400885	0.00451957	F	Y	Y
0.00150239	0.00175944	0.00359491	0.00356983	0.00525482	0.00493507	M	A	O
0.00211509	0.00185477	0.00252184	0.00213475	0.00439966	0.00468031	F	Y	Y
0.00244987	0.00261046	0.00390027	0.00395936	0.00558961	0.00581122	M	A	O
0.00156515	0.00167256	0.00293681	0.00297207	0.00473645	0.00520133	M	A	A
0.00148232	0.0013345	0.00245233	0.00214999	0.00382967	0.00391701	F	A	A
0.00132508	0.00223208	0.00492811	0.00454603	0.00164851	0.00112823	M	A	O
0.00173881	0.00166424	0.00310071	0.00287564	0.00419483	0.00492154	M	A	A
0.0017942	0.00189907	0.00262839	0.00271228	0.00440568	0.00507546	M	A	A
0.00144749	0.00138003	0.00276356	0.00257517	0.00461235	0.00482702	F	A	A
0.00180454	0.00186124	0.00284016	0.00262777	0.00484193	0.00513816	F	A	A
0.0018872	0.00239941	0.00345543	0.00347268	0.00474135	0.00517238	M	A	O
0.0018872	0.00239941	0.00345543	0.00347268	0.00474135	0.00517238	M	A	A
0.00138662	0.00176989	0.0026815	0.00261608	0.0038107	0.0039707	M	Y	Y
0.00166901	0.00160325	0.00342426	0.00326276	0.00469063	0.00450502	M	A	A
0.00194446	0.00240787	0.00288501	0.00350721	0.00451112	0.0050272	F	A	A
0.00173491	0.00179973	0.00275842	0.00333619	0.00444292	0.00598098	F	A	O
0.00173491	0.00179973	0.00275842	0.00333619	0.00444292	0.00598098	M	A	A
0.00248168	0.00247382	0.00367432	0.00381286	0.00512476	0.00461057	M	A	A
0.00167247	0.001635	0.00249593	0.00264325	0.0042459	0.00443409	F	Y	Y
0.00153558	0.00181649	0.00300347	0.00306897	0.00482506	0.00469188	F	A	A
0.00190049	0.00203364	0.00311963	0.00325452	0.00480396	0.00448664	F	A	A
0.00145382	0.00159329	0.00306927	0.00324199	0.00458312	0.00482327	F	A	A
0.00182387	0.00203003	0.00292868	0.00260111	0.00474392	0.00473746	F	A	A
0.00191259	0.00217893	0.0024685	0.00242649	0.00484672	0.00519886	F	A	A
0.00219416	0.00217386	0.00344216	0.00330603	0.00491846	0.00491339	F	A	O
0.0017348	0.00181912	0.00355228	0.00349743	0.00519211	0.00531491	M	A	O
0.00196601	0.00174979	0.00324812	0.00252738	0.00474084	0.00441171	M	A	O
0.00147612	0.00142386	0.0029515	0.00239002	0.00391169	0.00387286	M	A	A
0.00147586	0.00186667	0.0028728	0.0030751	0.00480767	0.00536552	F	A	A
0.00147586	0.00186667	0.0028728	0.0030751	0.00480767	0.00536552	M	A	A
0.00203476	0.00191129	0.00312064	0.00283564	0.00432576	0.00432323	F	A	A
0.00254955	0.00268437	0.00255732	0.00308389	0.0012176	0.00125219	F	A	A
0.0010626	0.00132886	0.00188636	0.00240061	0.00114729	0.00225986	M	A	O
0.00214962	0.00225982	0.00368008	0.00380913	0.0050844	0.00545705	M	A	O
0.00214962	0.00225982	0.00368008	0.00380913	0.0050844	0.00545705	M	A	A
0.00192309	0.00238793	0.00336416	0.00338708	0.00470996	0.00521491	F	A	A
0.00123553	0.00139951	0.00209927	0.00204414	0.00458871	0.00502199	M	A	A
0.00160241	0.00185144	0.00256773	0.00264517	0.00384983	0.00436901	F	A	A
0.00188389	0.00207093	0.00288864	0.00253625	0.0051981	0.0051963	F	A	A
0.00236171	0.00262067	0.003979	0.00390511	0.00527932	0.00530901	F	A	A
0.00225383	0.00178363	0.00369803	0.00429829	0.00475848	0.00489211	M	A	O
0.00199158	0.00225802	0.0028267	0.00289351	0.00452479	0.00483976	F	A	A
0.00167881	0.00189476	0.0025633	0.00269321	0.00461113	0.00510923	F	A	A
0.00200191	0.00236567	0.00329921	0.00339588	0.00525025	0.00517988	M	A	A
0.00183339	0.00187312	0.00290306	0.00239525	0.00462122	0.00503526	F	A	A
0.00226075	0.00257022	0.00329206	0.00361151	0.00509283	0.00563728	F	Y	Y
0.00200135	0.00230603	0.00356666	0.0034276	0.00522001	0.00486642	F	A	A
0.00155714	0.0017978	0.00313091	0.00304462	0.00451865	0.00488517	F	A	A
0.00196267	0.00215522	0.00390338	0.00334938	0.00466092	0.00486023	F	A	A
0.00182692	0.00192833	0.00252941	0.0024998	0.00458876	0.00542894	M	A	A
0.00184028	0.00200125	0.00277805	0.00268581	0.00465631	0.00491947	F	A	O
0.00103144	0.00139336	0.00185867	0.00188883	0.00493318	0.00530113	M	A	A
0.00157429	0.00190906	0.00319111	0.0034734	0.00515083	0.00584931	F	A	A
0.00196972	0.00241681	0.00294007	0.00304074	0.00462051	0.0049107	M	A	A
0.00157012	0.00187047	0.0035219	0.00503868	0.00365291	0.0030491	F	A	A
0.00211125	0.00244066	0.00292434	0.00305221	0.00465615	0.00508355	M	A	A
0.00211125	0.00244066	0.00292434	0.00305221	0.00465615	0.00508355	M	A	O
0.00130547	0.0012998	0.00213851	0.00245293	0.00470327	0.00525431	F	A	A
0.00143843	0.00164644	0.00323471	0.00283985	0.00437523	0.00451009	F	A	A
0.00173263	0.00189439	0.00279487	0.00303188	0.00448943	0.00486744	F	A	O
0.00175508	0.00205454	0.00361896	0.00394994	0.00221927	0.00235502	M	A	O
0.00245821	0.00155425	0.0029195	0.00293374	0.00111981	0.00215853	F	A	O
0.0021551	0.002437	0.00312463	0.00315953	0.0046573	0.00504129	M	Y	Y
0.00252166	0.00243732	0.00309466	0.00302162	0.00554478	0.00582563	F	A	A
0.00144345	0.00197176	0.00278306	0.00288918	0.00505721	0.00553531	F	A	A
0.00128553	0.00148811	0.00238764	0.00218256	0.00443932	0.00489284	F	A	A
0.00181956	0.00179047	0.00291967	0.00289743	0.00442442	0.00460578	F	A	O
0.00145328	0.00132564	0.00290432	0.00257814	0.00451659	0.00442179	F	Y	Y
0.00145328	0.00132564	0.00290432	0.00257814	0.00451659	0.00442179	M	A	A
0.00193043	0.0022084	0.00309432	0.00333051	0.00452679	0.00501111	F	A	A
0.00167653	0.00180089	0.00257539	0.00258563	0.00484382	0.00465098	F	A	A
0.00118865	0.00128377	0.00202541	0.00215926	0.00390687	0.00388667	F	Y	Y
0.00205893	0.00228017	0.0034475	0.00351437	0.00392302	0.00404851	F	A	O
0.00185796	0.00181211	0.00252942	0.00228622	0.00512189	0.00531432	F	A	A
0.00135142	0.00127772	0.00205801	0.00210678	0.00437287	0.00640379	M	A	A
0.00184083	0.00198028	0.00256441	0.00295887	0.0044395	0.00470965	M	A	A
0.00144161	0.00151513	0.0025063	0.00239648	0.00412566	0.00460403	F	A	A
0.00184366	0.00193192	0.00304884	0.00293006	0.00497169	0.00512925	F	A	A
0.00203168	0.00222212	0.00380428	0.0036894	0.00505567	0.00551675	M	A	O
0.0014622	0.00156421	0.00283939	0.0025427	0.00457362	0.00506584	F	A	O
0.00191221	0.00219658	0.00298726	0.00288184	0.00474342	0.00484468	F	A	A
0.00191221	0.00219658	0.00298726	0.00288184	0.00474342	0.00484468	F	Y	Y
0.00170092	0.00188141	0.00272346	0.00275481	0.00435707	0.00433642	M	A	A
0.00184341	0.00175595	0.00259887	0.00223396	0.00430807	0.00440382	F	Y	Y
0.00205137	0.00196265	0.00245352	0.00245352	0.00374123	0.00429595	F	A	A
0.00186439	0.00195086	0.00328511	0.00316147	0.0046234	0.00450218	F	A	A
0.00127561	0.00160876	0.00185674	0.00178723	0.00112845	0.00185173	F	A	O
0.00162406	0.00152073	0.00256899	0.00239467	0.00416465	0.00423169	F	Y	Y
0.00146154	0.00149658	0.00243471	0.00254626	0.00455838	0.00491376	M	A	A
0.00199812	0.00190166	0.00229476	0.00217074	0.00389108	0.00426605	F	Y	Y
0.00241082	0.00239733	0.00321707	0.00317739	0.00446691	0.00468594	F	A	A
0.00246517	0.00291437	0.00419985	0.00420556	0.00448812	0.00468769	M	A	O
0.00107007	0.000989037	0.00398475	0.00318319	0.00110264	0.00142596	F	A	A
0.00177391	0.00176611	0.00272755	0.00280204	0.00437847	0.00464178	F	Y	Y
0.00131723	0.0019266	0.00294606	0.0035085	0.00474263	0.00533661	F	A	O
0.00196554	0.00232329	0.00320964	0.00316059	0.00503563	0.00545851	F	A	A
0.00121681	0.00135141	0.00245336	0.00234927	0.00421487	0.00449754	F	Y	Y
0.00123647	0.00148195	0.00205978	0.00217987	0.00475629	0.00492171	F	Y	Y
0.00205857	0.002282	0.0039138	0.00410041	0.0046117	0.00490543	F	A	O
0.00171729	0.00190661	0.00307992	0.00308169	0.00455365	0.0047732	M	A	O
0.00196341	0.00217607	0.00287506	0.00308195	0.00438182	0.00420296	F	A	A
0.00155445	0.0015898	0.00250238	0.00239715	0.00498147	0.00519515	F	A	A
0.00158317	0.00173568	0.00219235	0.00233706	0.00412387	0.00449735	F	A	A
0.00149049	0.0019107	0.0027606	0.00268872	0.00458521	0.00509388	F	A	A
0.00141728	0.0016499	0.00275908	0.00306487	0.00463929	0.00503752	M	A	A
0.00262212	0.00327371	0.00353587	0.00380183	0.000994785	0.00268249	F	A	O
0.00156693	0.00158736	0.00324465	0.00297826	0.00527678	0.00537972	F	A	A
0.00154428	0.00183598	0.00248489	0.002963	0.0043396	0.00471943	F	A	A
0.00125134	0.00123909	0.00233442	0.00259906	0.00373442	0.00414445	F	A	A
0.0013182	0.00149955	0.00227668	0.00229242	0.0046343	0.0046358	F	Y	Y
0.00195837	0.00216371	0.00296667	0.00317967	0.00429983	0.00427148	F	Y	Y
0.00182896	0.00202957	0.00283713	0.00242269	0.0042105	0.00424798	F	A	A
0.00140401	0.00145814	0.00289175	0.00282832	0.00450383	0.00443109	M	A	O
0.00209455	0.00241058	0.00391091	0.00402943	0.00525323	0.00567873	F	A	A
0.0019095	0.00211062	0.00283674	0.00354592	0.00494876	0.00525149	M	A	A
0.00192507	0.00184472	0.00197754	0.00220055	0.00432813	0.00459951	F	Y	Y
0.00112646	0.00132174	0.0023958	0.00270421	0.00360144	0.00374136	M	A	A
0.00179032	0.00182755	0.00267969	0.0027831	0.00379905	0.00403236	F	A	A
0.00172563	0.00164402	0.00301131	0.00278589	0.00437705	0.00443535	F	A	O
0.00210864	0.0022977	0.00313246	0.00334515	0.00474557	0.00517477	F	A	A
0.00120861	0.00140557	0.00324876	0.00396761	0.00637008	0.00699729	M	A	O
0.00101006	0.001177	0.00233807	0.00268706	0.00492529	0.0051216	F	A	A
0.00138434	0.0018163	0.00450807	0.00419787	0.00491888	0.00277765	F	A	O
0.00138434	0.0018163	0.00450807	0.00419787	0.00491888	0.00277765	M	A	A
0.00167707	0.00182581	0.00211972	0.00198969	0.00378967	0.00395177	F	A	A
0.00151906	0.00189488	0.00209385	0.00259994	0.00474352	0.00542726	M	A	A
0.00202814	0.00170305	0.00304671	0.00289642	0.00435279	0.00412327	F	Y	Y
0.00205864	0.00254286	0.00272829	0.00280527	0.004612	0.00423834	M	A	A
0.00166753	0.00184184	0.00297051	0.00298244	0.00434592	0.00448202	M	A	A
0.00183051	0.00153382	0.00246806	0.0022651	0.00488653	0.00519175	M	A	O
0.00207979	0.0021932	0.00351885	0.00350633	0.00464417	0.00505438	M	A	A
0.00207979	0.0021932	0.00351885	0.00350633	0.00464417	0.00505438	M	Y	Y
0.00202214	0.00233862	0.00207605	0.00236313	0.00396655	0.00407438	M	A	O
0.00214955	0.00219461	0.00368548	0.00372678	0.00569382	0.00615122	M	Y	Y
0.00187195	0.00218046	0.00269178	0.00304488	0.00398337	0.00411138	M	Y	Y
0.0018773	0.00189795	0.00305162	0.00326701	0.00455494	0.00496138	F	A	A
0.00128591	0.00134838	0.00231708	0.00220755	0.00371171	0.00390804	F	Y	Y
0.00173552	0.00190674	0.00275504	0.00324794	0.00529218	0.00544956	F	A	A
0.00173552	0.00190674	0.00275504	0.00324794	0.00529218	0.00544956	F	A	A
0.00254772	0.00283389	0.00302542	0.00328605	0.00461849	0.00512623	M	A	A
0.00200794	0.00208365	0.00316947	0.00295803	0.00510034	0.00573191	F	A	A
0.00200794	0.00208365	0.00316947	0.00295803	0.00510034	0.00573191	M	A	O
0.00146509	0.00172888	0.002386	0.00235519	0.00490468	0.00501446	F	A	O
0.00197514	0.00229562	0.003823	0.00407604	0.00484277	0.00481852	F	A	A
0.00185834	0.0022433	0.00284578	0.00300891	0.00442015	0.00473778	F	A	A
0.00172061	0.00173977	0.00253707	0.00263213	0.00390177	0.0042061	M	A	A
0.00172061	0.00173977	0.00253707	0.00263213	0.00390177	0.0042061	F	A	O
0.00203936	0.0023688	0.0030008	0.00322962	0.00441367	0.00487062	F	A	A
0.00208349	0.00212011	0.00370415	0.00371584	0.0044241	0.00444591	F	A	A
0.00176135	0.00206846	0.00294544	0.00304562	0.00422478	0.00442185	F	A	A
0.00230667	0.00240157	0.00293425	0.00297997	0.00494584	0.00527071	M	Y	Y
0.00244329	0.00238609	0.00312157	0.0023377	0.0055304	0.00541161	M	A	O
0.00113702	0.00123611	0.00195578	0.00218252	0.00413662	0.00461024	F	A	A
0.00139915	0.00161548	0.00281487	0.0028215	0.00443284	0.0044718	F	A	O
0.00162977	0.00193082	0.00305975	0.00332675	0.00427738	0.00464741	M	A	A
0.00201927	0.00266216	0.00258994	0.00262309	0.000283562	0.00045287	F	A	A
0.00262814	0.00287066	0.00325217	0.0028241	0.00501654	0.0061124	M	A	A
0.00185455	0.00215976	0.00299547	0.00300782	0.00483912	0.00511817	M	A	A
0.0015214	0.00158562	0.00190366	0.002685	0.00286696	0.00245182	F	Y	Y
0.00166587	0.00185003	0.00264932	0.00291855	0.00425442	0.00471343	F	A	A
0.00209083	0.00224605	0.00350328	0.00346859	0.00439166	0.00487465	F	A	A
0.00232199	0.00204171	0.00387266	0.00306988	0.00507427	0.00465422	M	A	A
0.00158261	0.00170714	0.00285925	0.0026473	0.00480309	0.00519894	F	A	A
0.00146219	0.00150233	0.00244267	0.00251015	0.00447624	0.00498528	F	A	A
0.0019507	0.00200828	0.00367684	0.00401529	0.00500951	0.0049225	M	A	O
0.00197856	0.0020863	0.00266759	0.0027628	0.00470127	0.00505037	M	A	A
0.00161921	0.0016007	0.00314196	0.00235185	0.00444162	0.00453807	F	A	O
0.0018567	0.0019169	0.0027345	0.00295377	0.00534487	0.00601977	M	A	A
0.00132612	0.00170604	0.00318538	0.00334398	0.00642184	0.00576774	F	A	O
0.0038611	0.00599613	0.0062442	0.00304627	0.0106088	0.00211476	F	Y	Y
0.00209613	0.00187666	0.00272026	0.00278113	0.00455577	0.00492527	M	A	O
0.00143477	0.00143106	0.00211915	0.0025722	0.00417009	0.00445482	F	Y	Y
0.00287429	0.00346976	0.00118945	0.00218924	0.000670534	0.000851178	M	A	A
0.00287429	0.00346976	0.00118945	0.00218924	0.000670534	0.000851178	M	A	A
0.00129573	0.00160474	0.00249203	0.0023338	0.00468085	0.00454829	M	A	A
0.00161691	0.00183309	0.00278284	0.00295773	0.00511307	0.00494466	F	A	A
0.00193543	0.00203823	0.00313502	0.00334835	0.00391027	0.00420785	M	A	A
0.00209362	0.0022404	0.00265516	0.00265681	0.00413117	0.00454099	F	A	A
0.00129573	0.00160474	0.00249203	0.0023338	0.00468085	0.00454829	F	A	A
0.00172142	0.0018115	0.00238369	0.00246079	0.00476981	0.00540448	F	A	A
0.00198128	0.00205335	0.00275634	0.00254266	0.00473952	0.00493993	M	A	A
0.00240605	0.00264386	0.00378005	0.00395335	0.00557526	0.00550376	M	A	A
0.00165078	0.00183192	0.00234368	0.0025525	0.00438284	0.00444691	M	A	A
0.00163247	0.00298961	0.00343314	0.00385808	0.00525418	0.00592965	M	A	A
0.00166859	0.00185001	0.00290353	0.0029831	0.00462225	0.00496281	F	A	A
0.00233867	0.00259923	0.00348735	0.00365417	0.00436594	0.00497523	F	A	O
0.00165594	0.00206563	0.00281386	0.00276316	0.00438884	0.00479035	F	A	A
0.0019823	0.00219186	0.00380005	0.00370226	0.00488279	0.00478111	F	A	O
0.0017683	0.00246213	0.00339337	0.00320946	0.000133193	0.00151974	M	A	O
0.00219112	0.00248968	0.0038533	0.00424445	0.00459827	0.00542505	F	A	A
0.00219112	0.00248968	0.0038533	0.00424445	0.00459827	0.00542505	M	A	A
0.00159243	0.00176273	0.00225667	0.00261613	0.0035129	0.00392514	M	A	A
0.00183426	0.00178786	0.00251693	0.00236788	0.00507955	0.00522016	F	Y	Y
0.00188972	0.00194099	0.0037356	0.00334992	0.00474845	0.00495206	M	A	A
0.00191569	0.00218877	0.00302727	0.00346613	0.00515001	0.00563908	M	A	A
0.00185163	0.00210985	0.00277115	0.00320493	0.00424411	0.00425592	F	Y	Y
0.00195144	0.00202814	0.00274395	0.00275503	0.00395657	0.00418495	F	A	O
0.00332042	0.00428861	8.05611e-05	0.00314769	0.00246256	0.00118229	F	A	A
0.00123942	0.00151833	0.00238312	0.00240045	0.00433385	0.00462679	F	A	A
0.00207881	0.00198939	0.0027777	0.00236939	0.00440275	0.00445118	F	Y	Y
0.00229264	0.00256843	0.00282602	0.00305461	0.00456303	0.0049757	F	A	A
0.00152021	0.00187455	0.00276501	0.00284212	0.00449452	0.00484612	F	A	O
0.00185161	0.0017096	0.00274689	0.00294241	0.00485233	0.00524955	F	Y	Y
0.00203211	0.00180001	0.0037969	0.003429	0.00512266	0.00520242	M	A	O
0.00113906	0.00112442	0.00266655	0.00235982	0.004379	0.00421408	M	Y	Y
0.00183775	0.00210712	0.00290814	0.0032165	0.00536969	0.00525539	F	A	A
0.00223812	0.00246693	0.00375196	0.00401372	0.00604194	0.00633605	M	A	A
0.000865067	0.000942836	0.00230597	0.00196781	0.00365251	0.00409465	F	A	A
0.00231401	0.00261183	0.00318462	0.00337603	0.00510939	0.00560433	M	A	O
0.00175868	0.00178519	0.00307548	0.00273081	0.00417134	0.00448419	F	A	A
0.00181993	0.00202185	0.00272989	0.00219258	0.00558025	0.00583677	F	A	O
0.0020107	0.00211365	0.00273316	0.00314041	0.00476117	0.00504269	F	A	A
0.00152072	0.00165706	0.00293656	0.0027303	0.00458401	0.00476754	F	A	A
